# Supplementary material for: Alternative reproductive strategies in black-winged territorial males of Paraphlebia zoe (Odonata, Thaumatoneuridae)
Source: PeerJ. 2019 Feb 20;7:e6489. doi: 10.7717/peerj.6489 (PMC6387578; doi:10.7717/peerj.6489)
Supplement: Data S1 — All necessary data to replicate our calculations. [file peerj-07-6489-s005.xlsx]

## Sheet: Reproductive success
ID	Territorio	Morfo	exito reproductivo	longitud	longevidad	asimetria	numero ind_territorio	status	Fore-Black Right	Fore-Black Left	Back-Black Right	Back-Black left	Fore- white Right	Fore-white left	Back-white Right	Back-white left	size-fore-black	size-hind-black	size-fore-white	size-hind-white
29		BW	2	4.75	8	0.540612	1.5	D	0.709	0.702	0.729	0.678	0.195	0.132	0.128	0.119	0.7055	0.7035	0.1635	0.1235
31		BW	0	4.7	1	0.846896	0	S	0.61	0.896	0.589	0.486	0.135	0.128	0.12	0.096	0.753	0.5375	0.1315	0.108
33		BW	0	4.7	1	1.05227	0	S	0.579	0.472	0.542	0.436	0.142	0.097	0.106	0.082	0.5255	0.489	0.1195	0.094
34		BW	0	4.8	1	0.371908	0	S	0.675	0.622	0.655	0.623	0.213	0.171	0.142	0.139	0.6485	0.639	0.192	0.1405
35	T12	BW	0	4.7	31	0.49842	2.5	D	0.691	0.725	0.648	0.721	0.175	0.209	0.121	0.143	0.708	0.6845	0.192	0.132
36		BW	0	4.95	1	0.417692	0	S	0.525	0.472	0.498	0.479	0.141	0.128	0.099	0.083	0.4985	0.4885	0.1345	0.091
40		BW	0	4.3	1	1.06082	0	S	0.818	0.627	0.757	0.601	0.296	0.196	0.209	0.178	0.7225	0.679	0.246	0.1935
42		BW	0	4.4	1	0.543251	0	S	0.907	0.891	0.769	0.853	0.292	0.204	0.173	0.185	0.899	0.811	0.248	0.179
43		BW	0	4.55	1	0.47073	0	S	0.948	0.892	0.741	0.704	0.269	0.205	0.165	0.151	0.92	0.7225	0.237	0.158
47		BW	0	4.8	1	0.708125	0	S	0.643	0.658	0.609	0.638	0.175	0.188	0.091	0.163	0.6505	0.6235	0.1815	0.127
50		BW	0	4.75	1	1.0659	0	S	0.676	0.815	0.635	0.766	0.227	0.296	0.165	0.255	0.7455	0.7005	0.2615	0.21
54		BW	0	5.15	1	0.433745	0	S	0.843	0.792	0.895	0.723	0.395	0.342	0.266	0.27	0.8175	0.809	0.3685	0.268
55		BW	0	4.7	1	0.369055	0	S	0.664	0.715	0.638	0.684	0.182	0.197	0.133	0.154	0.6895	0.661	0.1895	0.1435
58		BW	0	4.35	1	0.710014	0	S	1.013	1.144	0.926	0.809	0.263	0.295	0.207	0.147	1.0785	0.8675	0.279	0.177
59		BW	0	4.55	1	0.950072	0	S	0.612	0.574	0.584	0.553	0.239	0.138	0.132	0.098	0.593	0.5685	0.1885	0.115
76	T8	BW	0	4.9	14	0.118892	0	S	0.719	0.729	0.692	0.678	0.19	0.189	0.131	0.121	0.724	0.685	0.1895	0.126
77		BW	0	4.55	1	0.0932683	0	S	0.731	0.716	0.662	0.691	0.254	0.248	0.173	0.174	0.7235	0.6765	0.251	0.1735
78		BW	0	4.65	1	0.418695	0	S	0.708	0.761	0.619	0.692	0.207	0.186	0.141	0.124	0.7345	0.6555	0.1965	0.1325
85		BW	0	4.85	1	0.366893	0	S	0.921	0.784	0.812	0.731	0.263	0.249	0.198	0.189	0.8525	0.7715	0.256	0.1935
87		BW	0	4.95	10	0.0656201	2.5	S	0.751	0.763	0.712	0.713	0.244	0.247	0.169	0.163	0.757	0.7125	0.2455	0.166
89	T1	BW	0	4.65	10	0.326162	2	S	0.642	0.675	0.559	0.601	0.206	0.217	0.149	0.128	0.6585	0.58	0.2115	0.1385
90		BW	0	4.8	1	0.280094	0	S	0.721	0.732	0.641	0.701	0.232	0.247	0.131	0.117	0.7265	0.671	0.2395	0.124
91	T1	BW	2	4.7	23	0.423591	1.5	D	0.605	0.662	0.565	0.639	0.186	0.203	0.155	0.137	0.6335	0.602	0.1945	0.146
92		BW	0	4.75	2	0.548892	2	S	0.609	0.701	0.581	0.649	0.148	0.177	0.126	0.142	0.655	0.615	0.1625	0.134
93		BW	0	5.25	2	0.101357	1	D	0.776	0.805	0.729	0.734	0.229	0.238	0.157	0.154	0.7905	0.7315	0.2335	0.1555
94		BW	0	4.95	6	0.415582	5	S	0.649	0.697	0.619	0.641	0.153	0.193	0.123	0.133	0.673	0.63	0.173	0.128
95		BW	0	5.05	1	0.450541	2	D	0.782	0.824	0.729	0.715	0.213	0.267	0.196	0.168	0.803	0.722	0.24	0.182
96		BW	0	4.9	1	0.21213	2	S	0.737	0.78	0.698	0.726	0.213	0.207	0.142	0.155	0.7585	0.712	0.21	0.1485
97		BW	0	4.95	2	0.540172	2	S	0.801	0.945	0.786	0.875	0.169	0.186	0.122	0.145	0.873	0.8305	0.1775	0.1335
100		BW	0	4.85	6	0.280147	1	D	0.648	0.681	0.599	0.647	0.169	0.182	0.131	0.121	0.6645	0.623	0.1755	0.126
101		BW	0	5.05	1	0.119892	0	S	0.816	0.805	0.739	0.743	0.242	0.224	0.171	0.167	0.8105	0.741	0.233	0.169
104		BW	0	4.9	1	0.299353	0	S	0.734	0.699	0.679	0.647	0.254	0.221	0.163	0.153	0.7165	0.663	0.2375	0.158
105		BW	0	4.55	1	0.205444	0	S	0.667	0.665	0.625	0.633	0.161	0.192	0.143	0.141	0.666	0.629	0.1765	0.142
108		BW	0	4.6	1	0.126488	2	D	0.637	0.651	0.569	0.554	0.159	0.168	0.086	0.088	0.644	0.5615	0.1635	0.087
109		BW	0	4.8	18	0.145602	5	D	0.802	0.796	0.754	0.731	0.218	0.227	0.155	0.145	0.799	0.7425	0.2225	0.15
110		BW	0	4.6	2	0.15613	2	S	0.628	0.617	0.601	0.587	0.168	0.156	0.1	0.096	0.6225	0.594	0.162	0.098
111		BW	0	4.35	11	0.383513	2	S	0.714	0.693	0.649	0.633	0.156	0.193	0.113	0.127	0.7035	0.641	0.1745	0.12
130	T12	BW	3	4.9	14		2.3	D
134	T4	BW	3	4.9	23	0.133031	5.3	S	0.739	0.757	0.741	0.779	0.207	0.215	0.141	0.144	0.748	0.76	0.211	0.1425
135	T6	BW	1	4.95	12	0.512057	3	D	0.835	0.909	0.771	0.857	0.29	0.271	0.172	0.222	0.872	0.814	0.2805	0.197
136	T5	BW	5	4.88	20	0.201854	2	D	0.829	0.849	0.802	0.807	0.213	0.224	0.116	0.131	0.839	0.8045	0.2185	0.1235
140		BW	0	4.9	1	0.346213	0	S	0.713	0.777	0.654	0.716	0.189	0.221	0.145	0.147	0.745	0.685	0.205	0.146
141	T10	BW	0	4.75	23	0.131271	1	D	0.651	0.615	0.643	0.611	0.197	0.195	0.153	0.151	0.633	0.627	0.196	0.152
142	T16	BW	1	5	23	0.648098	2	D	0.738	0.874	0.699	0.776	0.225	0.268	0.175	0.214	0.806	0.7375	0.2465	0.1945
143		BW	1	4.9	10	0.458772	1	D	0.74	0.819	0.693	0.754	0.213	0.256	0.149	0.163	0.7795	0.7235	0.2345	0.156
144	T15	BW	0	4.9	24	0.521957	1.5	S	0.741	0.923	0.695	0.829	0.209	0.236	0.166	0.167	0.832	0.762	0.2225	0.1665
145	T13	BW	1	4.9	17	0.196883	2	D	0.749	0.733	0.701	0.687	0.179	0.194	0.125	0.116	0.741	0.694	0.1865	0.1205
152		BW	0	4.95	1	0.660748	0	S	0.717	0.819	0.657	0.739	0.161	0.215	0.099	0.112	0.768	0.698	0.188	0.1055
153	T5	BW	0	4.85	7	0.385898	0	S	0.667	0.749	0.623	0.668	0.173	0.178	0.117	0.139	0.708	0.6455	0.1755	0.128
154	T7	BW	0	4.75	5	0.722352	1.5	D	0.685	0.659	0.657	0.723	0.254	0.233	0.177	0.106	0.672	0.69	0.2435	0.1415
183		BW	0	4.9	1	0.161722	2	S	0.845	0.829	0.769	0.777	0.216	0.205	0.169	0.156	0.837	0.773	0.2105	0.1625
184	T8	BW	3	5.1	21	0.240701	1.3	D	0.848	0.839	0.78	0.798	0.284	0.263	0.196	0.172	0.8435	0.789	0.2735	0.184
186	T14	BW	1	5.15	20	0.250536	2	D	0.835	0.859	0.856	0.804	0.309	0.272	0.214	0.221	0.847	0.83	0.2905	0.2175
187	T15	BW	0	4.9	20	0.267027	1.5	D	0.809	0.844	0.788	0.794	0.232	0.236	0.153	0.187	0.8265	0.791	0.234	0.17
188	T9	BW	0	5.48	10	0.139479	2	D	0.901	0.899	0.905	0.878	0.26	0.244	0.18	0.188	0.9	0.8915	0.252	0.184
190		BW	0	5	1	0.131519	0	S	0.721	0.718	0.702	0.714	0.211	0.206	0.169	0.155	0.7195	0.708	0.2085	0.162
191		BW	0	5	19	0.106333	0	S	0.702	0.708	0.658	0.651	0.19	0.181	0.127	0.132	0.705	0.6545	0.1855	0.1295
192	T13	BW	0	4.8	2	0.196126	2	D	0.668	0.714	0.598	0.625	0.155	0.163	0.116	0.112	0.691	0.6115	0.159	0.114
193		BW	0	4.95	1	0.3298	0	S	0.754	0.803	0.698	0.728	0.229	0.269	0.166	0.177	0.7785	0.713	0.249	0.1715
194		BW	0	4.7	1	0.124602	0	S	0.723	0.739	0.682	0.701	0.242	0.23	0.166	0.162	0.731	0.6915	0.236	0.164
195	T6	BW	0	4.8	18	0.545422	2	D	0.675	0.728	0.623	0.689	0.162	0.197	0.11	0.131	0.7015	0.656	0.1795	0.1205
196		BW	0	4.95	1	0.203334	0	S	0.721	0.713	0.665	0.671	0.269	0.261	0.169	0.197	0.717	0.668	0.265	0.183
199		BW	0	4.85	2	0.545004	0	S	0.765	0.839	0.705	0.798	0.21	0.248	0.169	0.199	0.802	0.7515	0.229	0.184
200	Talt4/20	BW	0	5	18	0.223318	1	D	0.778	0.755	0.704	0.72	0.156	0.181	0.132	0.135	0.7665	0.712	0.1685	0.1335
201	T2	BW	0	4.85	15	0.330948	1.5	D	0.614	0.651	0.561	0.614	0.193	0.199	0.149	0.128	0.6325	0.5875	0.196	0.1385
202	Ta5	BW	0	5.2	12	0.182149	2	S	0.846	0.889	0.818	0.835	0.252	0.269	0.197	0.188	0.8675	0.8265	0.2605	0.1925
204		BW	0	4.9	1	0.455889	0	S	0.641	0.723	0.598	0.683	0.201	0.231	0.136	0.145	0.682	0.6405	0.216	0.1405
205		BW	0	4.95	1	0.192918	0	S	0.848	0.814	0.707	0.71	0.252	0.237	0.169	0.155	0.831	0.7085	0.2445	0.162
206		BW	0	5	1	0.135584	0	S	0.679	0.692	0.63	0.643	0.221	0.231	0.15	0.158	0.6855	0.6365	0.226	0.154
207	T3	BW	0	4.85	2	0.653382	1.5	D	0.766	0.753	0.728	0.689	0.241	0.169	0.223	0.177	0.7595	0.7085	0.205	0.2
208	T14	BW	0	4.9	8	0.107291	2	S	0.659	0.631	0.618	0.621	0.203	0.207	0.124	0.129	0.645	0.6195	0.205	0.1265
209		BW	0	4.9	1	0.243177	6	S	0.651	0.712	0.631	0.657	0.262	0.265	0.165	0.149	0.6815	0.644	0.2635	0.157
210	T14	BW	0	5	15	0.48688	2	D	0.659	0.711	0.621	0.697	0.204	0.209	0.159	0.121	0.685	0.659	0.2065	0.14
226	T4	BW	0	4.8	19	0.199061	5	S	0.743	0.701	0.732	0.653	0.193	0.191	0.121	0.123	0.722	0.6925	0.192	0.122
228	T3	BW	0	4.8	2	0.279119	1.5	D	0.735	0.655	0.659	0.659	0.184	0.192	0.116	0.131	0.695	0.659	0.188	0.1235
231		BW	0	4.7	1		0	S
232		BW	0	4.7	1	0.197989	0	S	0.783	0.796	0.733	0.746	0.179	0.192	0.132	0.145	0.7895	0.7395	0.1855	0.1385
234	T4	BW	0	4.65	16	0.323476	5	S	0.646	0.716	0.59	0.608	0.159	0.153	0.099	0.085	0.681	0.599	0.156	0.092
235	T15	BW	0	4.95	1	0.260634	2	D	0.739	0.751	0.665	0.728	0.22	0.204	0.119	0.11	0.745	0.6965	0.212	0.1145
236		BW	0	4.9	1	0.233486	0	S	0.693	0.702	0.571	0.605	0.207	0.184	0.13	0.136	0.6975	0.588	0.1955	0.133
238	T16	BW	0	4.9	2	0.353906	2	S	0.725	0.638	0.605	0.549	0.219	0.201	0.135	0.141	0.6815	0.577	0.21	0.138
239	T16	BW	0	4.85	18	0.239405	2	S	0.646	0.634	0.603	0.591	0.177	0.193	0.139	0.124	0.64	0.597	0.185	0.1315
240	T16	BW	0	4.9	1	0.527659	0	S	0.739	0.675	0.672	0.626	0.189	0.191	0.149	0.104	0.707	0.649	0.19	0.1265
246	T15	BW	0	4.85	11	0.428216	2	D	0.729	0.769	0.674	0.689	0.191	0.219	0.164	0.132	0.749	0.6815	0.205	0.148
247	T13	BW	0	5	1	0.440082	2	S	0.804	0.836	0.793	0.801	0.183	0.215	0.123	0.155	0.82	0.797	0.199	0.139
248	T7	BW	0	5	11	0.204575	1.5	D	0.728	0.751	0.73	0.721	0.229	0.251	0.164	0.153	0.7395	0.7255	0.24	0.1585
251	T7	BW	0	4.8	1	0.257031	1.5	D	0.889	0.825	0.868	0.831	0.249	0.272	0.193	0.203	0.857	0.8495	0.2605	0.198
253	T3	BW	0	5.1	5	0.127726	1.5	S	0.853	0.904	0.831	0.863	0.287	0.283	0.222	0.226	0.8785	0.847	0.285	0.224
254	T12	BW	0	4.9	4	0.270979	2.5	S	0.934	0.857	0.907	0.849	0.263	0.281	0.214	0.203	0.8955	0.878	0.272	0.2085
257		BW	0	4.65	1	0.31771	0	S	0.743	0.762	0.642	0.706	0.169	0.168	0.118	0.143	0.7525	0.674	0.1685	0.1305
258		BW	0	4.8	1	0.18891	0	S	0.748	0.779	0.699	0.721	0.214	0.236	0.152	0.155	0.7635	0.71	0.225	0.1535
259		BW	0	4.95	1	0.342515	0	S	0.807	0.784	0.78	0.718	0.205	0.228	0.162	0.143	0.7955	0.749	0.2165	0.1525
260	Talt4	BW	0	4.95	16	0.378254	1	D	0.795	0.89	0.78	0.859	0.231	0.269	0.174	0.177	0.8425	0.8195	0.25	0.1755
264		BW	0	4.55	1	0.216711	0	S	0.687	0.716	0.565	0.582	0.182	0.201	0.126	0.132	0.7015	0.5735	0.1915	0.129
266		BW	0	4.95	1	0.0351998	1.5	D	0.758	0.764	0.683	0.687	0.296	0.298	0.202	0.205	0.761	0.685	0.297	0.2035
267	Ta2	BW	0	4.5	6	0.235563	2	S	0.771	0.791	0.684	0.711	0.212	0.236	0.151	0.161	0.781	0.6975	0.224	0.156
268	Ta2	BW	0	5	14	0.583161	2	S	0.774	0.833	0.687	0.771	0.231	0.289	0.144	0.171	0.8035	0.729	0.26	0.1575
269	T4	BW	3	4.75	17	0.417416	4.66	S	0.808	0.878	0.757	0.776	0.183	0.213	0.134	0.157	0.843	0.7665	0.198	0.1455
270	T2	BW	1	5.15	9	0.305645	1	D	0.702	0.744	0.669	0.702	0.243	0.222	0.203	0.182	0.723	0.6855	0.2325	0.1925
272	T3	BW	0	4.85	15	0.685311	2.5	S	0.788	0.903	0.733	0.823	0.206	0.249	0.122	0.156	0.8455	0.778	0.2275	0.139
273	T1	BW	0	4.85	13	0.577696	2.66	S	0.798	0.832	0.769	0.841	0.298	0.357	0.205	0.268	0.815	0.805	0.3275	0.2365
274	T4	BW	1	4.85	4	0.468923	4	D	0.59	0.624	0.556	0.591	0.136	0.153	0.098	0.124	0.607	0.5735	0.1445	0.111
277		BW	0	4.7	4	0.305402	0	S	0.756	0.773	0.687	0.726	0.213	0.241	0.154	0.171	0.7645	0.7065	0.227	0.1625
278	T4	BW	0	5	16	0.104926	2	S	0.834	0.849	0.798	0.821	0.224	0.236	0.154	0.153	0.8415	0.8095	0.23	0.1535
280		BW	0	4.92	1	0.359965	0	S	0.781	0.739	0.726	0.678	0.224	0.266	0.175	0.164	0.76	0.702	0.245	0.1695
281	T15	BW	0	4.8	16	0.202904	2	D	0.707	0.735	0.671	0.679	0.189	0.217	0.141	0.139	0.721	0.675	0.203	0.14
282	T9	BW	1	4.7	15	0.154023	2	D	0.556	0.547	0.509	0.497	0.151	0.139	0.095	0.098	0.5515	0.503	0.145	0.0965
284	T3	BW	0	4.7	7	0.282005	2.66	S	0.562	0.606	0.536	0.571	0.162	0.182	0.112	0.109	0.584	0.5535	0.172	0.1105
286	T7	BW	0	4.95	5	0.552765	1.75	S	0.628	0.622	0.602	0.585	0.217	0.177	0.141	0.103	0.625	0.5935	0.197	0.122
287	FT	BW	1	4.7	1	0.240391	0	S	0.647	0.627	0.576	0.564	0.198	0.226	0.184	0.174	0.637	0.57	0.212	0.179
293		BW	0	4.7	1	0.556528	0	S	0.554	0.602	0.498	0.529	0.172	0.144	0.109	0.086	0.578	0.5135	0.158	0.0975
294	T13	BW	0	4.8	14	0.347824	2	S	0.737	0.762	0.687	0.703	0.237	0.268	0.18	0.152	0.7495	0.695	0.2525	0.166
295	T5	BW	0	4.9	7	0.307292	2	S	0.702	0.762	0.648	0.634	0.154	0.133	0.119	0.126	0.732	0.641	0.1435	0.1225
298	Ta3	BW	0	4.9	13	0.246561	2	D	0.779	0.784	0.728	0.741	0.207	0.252	0.187	0.192	0.7815	0.7345	0.2295	0.1895
300	T3	BW	1	4.7	13		1	D
303	T13	BW	0	4.75	11	0.262462	3	S	0.725	0.741	0.688	0.668	0.172	0.148	0.111	0.118	0.733	0.678	0.16	0.1145
307		BW	0	4.85	11	0.415317	0	S	0.728	0.701	0.704	0.623	0.264	0.269	0.189	0.149	0.7145	0.6635	0.2665	0.169
310	T1	BW	0	4.7	11	0.22527	5	S	0.648	0.668	0.653	0.628	0.189	0.188	0.15	0.129	0.658	0.6405	0.1885	0.1395
312	T6	BW	0	4.85	13	0.255709	4	S	0.798	0.677	0.698	0.651	0.171	0.172	0.123	0.125	0.7375	0.6745	0.1715	0.124
315		BW	0	5	1	0.128354	0	S	0.753	0.735	0.686	0.667	0.246	0.25	0.189	0.178	0.744	0.6765	0.248	0.1835
317	T13	BW	0	4.75	6	0.343774	2	D	0.642	0.678	0.576	0.574	0.156	0.177	0.115	0.098	0.66	0.575	0.1665	0.1065
318		BW	0	5.1	1	0.351183	0	S	0.744	0.725	0.699	0.675	0.177	0.204	0.137	0.159	0.7345	0.687	0.1905	0.148
321	T3	HW	2	4.8	13		2.5	S
322	T5	BW	1	4.7	13		1	S
326	T12	BW	1	4.75	12	0.322762	3	D	0.649	0.632	0.577	0.538	0.202	0.186	0.164	0.142	0.6405	0.5575	0.194	0.153
327		BW	0	4.8	2	0.298441	1.5	D	0.673	0.618	0.576	0.559	0.232	0.212	0.133	0.146	0.6455	0.5675	0.222	0.1395
328		BW	0	4.55	1	0.266648	2	S	0.756	0.71	0.744	0.731	0.268	0.247	0.201	0.181	0.733	0.7375	0.2575	0.191
330	T4	BW	2	5.05	12	0.229897	4.5	D	0.776	0.763	0.679	0.638	0.254	0.223	0.146	0.143	0.7695	0.6585	0.2385	0.1445
336	T7	BW	0	4.85	3	0.199289	2	D	0.789	0.828	0.767	0.775	0.254	0.237	0.162	0.174	0.8085	0.771	0.2455	0.168
338	T1	BW	0	5.13	9	0.0893322	3.5	S	0.832	0.873	0.763	0.752	0.272	0.275	0.189	0.192	0.8525	0.7575	0.2735	0.1905
339	T1	BW	0	4.89	10	0.157246	2	S	0.733	0.75	0.69	0.697	0.199	0.208	0.156	0.144	0.7415	0.6935	0.2035	0.15
342	T12	BW	0	4.8	1	0.266007	2.5	S	0.736	0.718	0.661	0.633	0.229	0.224	0.167	0.14	0.727	0.647	0.2265	0.1535
345	T14	BW	0	4.62	10	0.210633	2	S	0.682	0.703	0.647	0.634	0.164	0.174	0.125	0.113	0.6925	0.6405	0.169	0.119
346		BW	0	4.55	9	0.338966	0	S	0.674	0.703	0.637	0.612	0.196	0.231	0.154	0.169	0.6885	0.6245	0.2135	0.1615
347		BW	0	4.69	1	0.142922	0	S	0.816	0.878	0.876	0.9	0.281	0.292	0.232	0.233	0.847	0.888	0.2865	0.2325
351		BW	0	4.99	1	0.275092	0	S	0.835	0.847	0.815	0.791	0.212	0.232	0.132	0.152	0.841	0.803	0.222	0.142
352		BW	0	4.55	2	0.544339	0	S	0.667	0.728	0.646	0.712	0.189	0.22	0.155	0.191	0.6975	0.679	0.2045	0.173
353		BW	0	5	1	0.199676	0	S	0.729	0.765	0.743	0.712	0.212	0.228	0.169	0.163	0.747	0.7275	0.22	0.166
354		BW	0	4.7	1	0.393044	0	S	0.739	0.747	0.671	0.698	0.212	0.229	0.124	0.162	0.743	0.6845	0.2205	0.143
355		BW	0	4.95	1	0.12419	0	S	0.858	0.829	0.775	0.79	0.248	0.259	0.186	0.181	0.8435	0.7825	0.2535	0.1835
370	T5	BW	0	4.95	1	0.324027	2	S	0.825	0.767	0.768	0.724	0.22	0.211	0.193	0.166	0.796	0.746	0.2155	0.1795
371	T6	BW	0	5.1	8	0.322517	2	S	0.821	0.805	0.792	0.728	0.281	0.245	0.191	0.176	0.813	0.76	0.263	0.1835
372	T4	BW	0	4.8	7	0.213175	2	S	0.759	0.784	0.709	0.712	0.195	0.219	0.153	0.144	0.7715	0.7105	0.207	0.1485
373	T12	BW	0	4.92	8	0.113417	2.5	S	0.683	0.689	0.615	0.587	0.229	0.241	0.143	0.142	0.686	0.601	0.235	0.1425
376	T1	BW	0	5	7	0.253782	2	S	0.71	0.743	0.662	0.681	0.182	0.18	0.13	0.154	0.7265	0.6715	0.181	0.142
378	T2	BW	0	4.8	1	0.153261	1.5	D	0.727	0.717	0.683	0.682	0.251	0.223	0.153	0.15	0.722	0.6825	0.237	0.1515
379	T2	BW	0	4.95	1	0.367039	1.5	D	0.784	0.809	0.831	0.786	0.257	0.247	0.289	0.227	0.7965	0.8085	0.252	0.258
383	T6	BW	1	5.1	7		1	D
384		BW	0	4.9	1	0.172699	0	S	0.714	0.742	0.678	0.691	0.196	0.188	0.144	0.155	0.728	0.6845	0.192	0.1495
385		BW	0	4.85	1	0.669108	0	S	0.751	0.798	0.697	0.743	0.22	0.236	0.119	0.193	0.7745	0.72	0.228	0.156
386		BW	0	4.9	1	0.249178	0	S	0.791	0.829	0.769	0.758	0.244	0.251	0.173	0.203	0.81	0.7635	0.2475	0.188
389	T4	BW	1	4.5	6	0.610058	6	D	0.741	0.671	0.688	0.632	0.198	0.15	0.136	0.117	0.706	0.66	0.174	0.1265
393	T2	BW	0	4.9	3	0.456725	1.5	S	0.829	0.782	0.828	0.787	0.213	0.239	0.192	0.152	0.8055	0.8075	0.226	0.172
399	T5	BW	0	4.7	4	0.506779	2	S	0.677	0.646	0.656	0.634	0.217	0.172	0.158	0.13	0.6615	0.645	0.1945	0.144
400	T6	BW	0	5	1	0.228462	2	D	0.781	0.768	0.716	0.735	0.276	0.233	0.183	0.18	0.7745	0.7255	0.2545	0.1815
401	T7	BW	0	5.1	3	0.620789	1.5	S	0.713	0.759	0.652	0.693	0.186	0.255	0.154	0.128	0.736	0.6725	0.2205	0.141
405	T14	BW	0	4.6	1	0.364323	2	S	0.614	0.586	0.549	0.54	0.163	0.135	0.112	0.1	0.6	0.5445	0.149	0.106
408		BW	0	4.6	1	0.148734	0	S	0.601	0.622	0.523	0.533	0.211	0.217	0.138	0.129	0.6115	0.528	0.214	0.1335
412	Talt1/17	BW	0	5	1	0.161518	1	D	0.751	0.727	0.663	0.651	0.202	0.197	0.146	0.134	0.739	0.657	0.1995	0.14
413	T9	BW	0	4.6	1	0.560331	2	S	0.688	0.667	0.452	0.574	0.137	0.162	0.083	0.094	0.6775	0.513	0.1495	0.0885
414	T4	BW	0	4.75	1	0.395527	5	S	0.711	0.782	0.686	0.708	0.276	0.261	0.172	0.213	0.7465	0.697	0.2685	0.1925
415	T4	BW	2	4.9	1	0.249165	2.5	D	0.744	0.809	0.654	0.711	0.235	0.225	0.159	0.153	0.7765	0.6825	0.23	0.156
416	T3	BW	0	5.05	1	0.145191	1.5	D	0.816	0.794	0.752	0.756	0.263	0.269	0.209	0.191	0.805	0.754	0.266	0.2
417	T14	BW	0	4.7	1	0.557121	2	S	0.699	0.631	0.637	0.581	0.212	0.186	0.173	0.137	0.665	0.609	0.199	0.155
419	T3	BW	0	4.7	1	0.565478	1.5	D	0.652	0.721	0.637	0.719	0.201	0.237	0.152	0.182	0.6865	0.678	0.219	0.167
425	T11	HW	2	4.55	12		1.5	S
426	T2	BW	2	4.9	7	0.260135	1.5	D	0.819	0.815	0.787	0.739	0.184	0.154	0.134	0.136	0.817	0.763	0.169	0.135
452	T4	BW	1	4.75	4	0.350554	3	D	0.605	0.604	0.568	0.548	0.165	0.146	0.132	0.109	0.6045	0.558	0.1555	0.1205
456	T4	BW	1	4.55	2	0.185698	3	D	0.716	0.689	0.664	0.613	0.255	0.246	0.226	0.219	0.7025	0.6385	0.2505	0.2225
462	T3	BW	1	4.85	5	0.301619	1	D	0.681	0.652	0.639	0.601	0.184	0.187	0.169	0.141	0.6665	0.62	0.1855	0.155
471	T14	BW	1	4.4	4	0.27647	2	S	0.552	0.534	0.503	0.499	0.161	0.139	0.097	0.106	0.543	0.501	0.15	0.1015
467	T14	BW	1	4.6	5	0.425983	2	D	0.662	0.562	0.584	0.518	0.227	0.248	0.17	0.161	0.612	0.551	0.2375	0.1655
450	T13	BW	1	4.92	3	0.251834	2	S	0.681	0.697	0.618	0.632	0.209	0.21	0.125	0.153	0.689	0.625	0.2095	0.139
440	T4	BW	1	4.5	9	0.228332	6	S	0.662	0.668	0.593	0.637	0.191	0.171	0.158	0.164	0.665	0.615	0.181	0.161
447	T16	BW	1	4.9	5	0.480461	3	S	0.712	0.767	0.658	0.732	0.234	0.251	0.204	0.162	0.7395	0.695	0.2425	0.183

## Sheet: Mark-Recapture
					2017-06-11	2017-06-16	2017-06-17	2017-06-18	2017-06-19	2017-06-21	2017-06-23	2017-06-24	2017-06-25	2017-06-26	2017-06-27	2017-06-28	2017-06-29	2017-06-30	2017-07-01	2017-07-02	2017-07-03	2017-07-04	2017-07-05	2017-07-06	2017-07-08	2017-07-09	2017-07-10	2017-07-11	2017-07-12
					5	1	1	1	2	2	2	1	1	1	1	1	1	1	1	1	1	1	1	2	1	1	1	1
	Code				1	2	3	4	5	6	7	8	9	10	11	12	13	14	15	16	17	18	19	20	21	22	23	24	25			maleBWD		maleBWS		maleHW		female		longitud cuerpo		length^2	;	Recapturas
/*	29	*/			1	0	0	0	1	0	0	0	0	0	0	0	0	0	0	0	0	0	0	0	0	0	0	0	0			0		1		0		0		4.9		24.01	;	2
/*	30	*/			1	0	0	0	0	0	0	0	0	0	0	0	0	0	0	0	0	0	0	0	0	0	0	0	0			0		0		1		0		4.4		19.36	;	1
/*	31	*/			1	0	0	0	0	0	0	0	0	0	0	0	0	0	0	0	0	0	0	0	0	0	0	0	0			0		1		0		0		4.7		22.09	;	1
/*	32	*/			1	0	0	0	0	0	0	0	0	0	0	0	0	0	0	0	0	0	0	0	0	0	0	0	0			0		0		1		0		4.15		17.2225	;	1
/*	33	*/			1	0	0	0	0	0	0	0	0	0	0	0	0	0	0	0	0	0	0	0	0	0	0	0	0			0		1		0		0		4.7		22.09	;	1
/*	34	*/			1	0	0	0	0	0	0	0	0	0	0	0	0	0	0	0	0	0	0	0	0	0	0	0	0			0		1		0		0		4.8		23.04	;	1
/*	35	*/			1	0	0	0	0	0	0	0	0	0	1	0	0	0	0	1	1	1	1	1	1	0	1	1	1			1		0		0		0		4.7		22.09	;	11
/*	36	*/			1	0	0	0	0	0	0	0	0	0	0	0	0	0	0	0	0	0	0	0	0	0	0	0	0			0		1		0		0		4.95		24.5025	;	1
/*	37	*/			1	0	0	0	0	0	0	0	0	0	0	0	0	0	0	0	0	0	0	0	0	0	0	0	0			0		0		0		1		4.6		21.16	;	1
/*	38	*/			1	0	0	0	0	0	0	0	0	0	0	0	0	0	0	0	0	0	0	0	0	0	0	0	0			0		0		0		1		4.1		16.81	;	1
/*	39	*/			1	0	0	0	0	0	0	0	0	0	0	0	0	0	0	0	0	0	0	0	0	0	0	0	0			0		0		1		0		4.3		18.49	;	1
/*	40	*/			1	0	0	0	0	0	0	0	0	0	0	0	0	0	0	0	0	0	0	0	0	0	0	0	0			0		1		0		0		4.3		18.49	;	1
/*	41	*/			1	1	0	1	1	0	1	0	0	0	0	0	0	0	0	0	0	0	0	0	0	0	0	0	0			0		0		1		0		4.35		18.9225	;	5
/*	42	*/			1	0	0	0	0	0	0	0	0	0	0	0	0	0	0	0	0	0	0	0	0	0	0	0	0			0		1		0		0		4.4		19.36	;	1
/*	43	*/			1	0	0	0	0	0	0	0	0	0	0	0	0	0	0	0	0	0	0	0	0	0	0	0	0			0		1		0		0		4.55		20.7025	;	1
/*	44	*/			1	0	0	0	0	0	0	0	0	0	0	0	0	0	0	0	0	0	0	0	0	0	0	0	0			0		0		0		1		4.05		16.4025	;	1
/*	45	*/			1	0	0	0	0	0	0	0	0	0	0	0	0	0	0	0	0	0	0	0	0	0	0	0	0			0		0		0		1		4.35		18.9225	;	1
/*	46	*/			1	0	0	0	0	0	0	0	0	0	0	0	0	0	0	0	0	0	0	0	0	0	0	0	0			0		0		0		1		4.25		18.0625	;	1
/*	47	*/			1	0	0	0	0	0	0	0	0	0	0	0	0	0	0	0	0	0	0	0	0	0	0	0	0			0		1		0		0		4.8		23.04	;	1
/*	48	*/			1	0	0	0	0	0	0	0	0	0	0	0	0	0	0	0	0	0	0	0	0	0	0	0	0			0		0		1		0		4.45		19.8025	;	1
/*	49	*/			1	0	0	0	0	0	1	0	0	0	0	0	0	0	0	0	0	0	0	0	0	0	0	0	0			0		0		0		1		4.2		17.64	;	2
/*	50	*/			1	0	0	0	0	0	0	0	0	0	0	0	0	0	0	0	0	0	0	0	0	0	0	0	0			0		1		0		0		4.75		22.5625	;	1
/*	51	*/			1	0	0	0	0	0	0	0	0	0	0	0	1	0	0	0	0	0	0	0	0	0	0	0	0			0		0		0		1		4.25		18.0625	;	2
/*	52	*/			1	0	0	0	0	0	0	0	0	0	0	0	0	0	0	0	0	0	0	0	0	0	0	0	0			0		0		0		1		4.05		16.4025	;	1
/*	53	*/			1	0	0	0	0	0	0	0	0	0	0	0	0	0	0	0	0	0	0	0	0	0	0	0	0			0		0		0		1		3.85		14.8225	;	1
/*	54	*/			1	0	0	0	0	0	0	0	0	0	0	0	0	0	0	0	0	0	0	0	0	0	0	0	0			0		1		0		0		5.15		26.5225	;	1
/*	55	*/			1	0	0	0	0	0	0	0	0	0	0	0	0	0	0	0	0	0	0	0	0	0	0	0	0			0		1		0		0		4.7		22.09	;	1
/*	56	*/			1	0	0	0	0	0	0	0	0	0	0	0	0	0	0	0	0	0	0	0	0	0	0	0	0			0		0		0		1		4.35		18.9225	;	1
/*	57	*/			1	0	0	0	0	0	0	0	0	0	0	0	0	0	0	0	0	0	0	0	0	0	0	0	0			0		0		0		1		3.95		15.6025	;	1
/*	58	*/			1	0	0	0	0	0	0	0	0	0	0	0	0	0	0	0	0	0	0	0	0	0	0	0	0			0		1		0		0		4.35		18.9225	;	1
/*	59	*/			1	0	0	0	0	0	0	0	0	0	0	0	0	0	0	0	0	0	0	0	0	0	0	0	0			0		1		0		0		4.55		20.7025	;	1
/*	60	*/			1	0	0	0	0	0	0	0	0	0	0	0	0	0	0	0	0	0	0	0	0	0	0	0	0			0		0		0		1		4		16	;	1
/*	61	*/			1	0	0	0	0	0	0	0	0	0	0	0	0	0	0	0	0	0	0	0	0	0	0	0	0			0		0		0		1		4.25		18.0625	;	1
/*	74	*/			0	1	0	0	0	0	0	0	0	0	0	0	0	0	0	0	0	0	0	0	0	0	0	0	0			0		0		0		1		4.05		16.4025	;	1
/*	75	*/			0	1	0	0	0	0	0	0	0	0	0	0	0	0	0	0	0	0	0	0	0	0	0	0	0			0		0		0		1		4.1		16.81	;	1
/*	76	*/			0	1	0	0	0	1	0	0	0	0	1	0	0	1	0	0	0	0	0	0	0	0	0	0	0			0		1		0		0		4.9		24.01	;	4
/*	77	*/			0	1	0	0	0	0	0	0	0	0	0	0	0	0	0	0	0	0	0	0	0	0	0	0	0			0		1		0		0		4.55		20.7025	;	1
/*	78	*/			0	1	0	0	0	0	0	0	0	0	0	0	0	0	0	0	0	0	0	0	0	0	0	0	0			0		1		0		0		4.65		21.6225	;	1
/*	79	*/			0	1	0	0	0	0	0	0	0	0	0	0	0	0	0	0	0	0	0	0	0	0	0	0	0			0		0		0		1		4.2		17.64	;	1
/*	80	*/			0	1	0	0	0	0	0	0	0	0	0	0	0	0	0	0	0	0	0	0	0	0	0	0	0			0		0		0		1		4.05		16.4025	;	1
/*	81	*/			0	1	0	0	0	0	0	0	0	0	0	0	0	0	0	0	0	0	0	0	0	0	0	0	0			0		0		0		1		3.95		15.6025	;	1
/*	82	*/			0	1	0	0	0	0	0	0	0	0	0	0	0	0	0	0	0	0	0	0	0	0	0	0	0			0		0		1		0		4.05		16.4025	;	1
/*	83	*/			0	1	1	0	0	0	0	0	0	0	0	0	0	0	0	0	0	0	0	0	0	0	0	0	0			0		0		0		1		4.3		18.49	;	2
/*	84	*/			0	1	0	0	0	0	0	0	0	0	0	0	0	0	0	0	0	0	0	0	0	0	0	0	0			0		0		0		1		4.5		20.25	;	1
/*	85	*/			0	1	0	0	0	0	0	0	0	0	0	0	0	0	0	0	0	0	0	0	0	0	0	0	0			0		1		0		0		4.85		23.5225	;	1
/*	86	*/			0	1	0	0	0	0	0	0	0	0	0	0	0	0	0	0	0	0	0	0	0	0	0	0	0			0		0		0		1		4.45		19.8025	;	1
/*	87	*/			0	1	0	1	0	0	0	0	0	1	0	0	0	0	0	0	0	0	0	0	0	0	0	0	0			0		1		0		0		4.95		24.5025	;	3
/*	88	*/			0	0	1	0	0	0	0	0	0	0	0	0	0	0	0	0	0	0	0	0	0	0	0	0	0			0		0		0		1		4.25		18.0625	;	1
/*	89	*/			0	0	1	1	1	1	0	0	0	1	1	0	0	0	0	0	0	0	0	0	0	0	0	0	0			0		1		0		0		4.65		21.6225	;	6
/*	90	*/			0	0	1	0	0	0	0	0	0	0	0	0	0	0	0	0	0	0	0	0	0	0	0	0	0			0		1		0		0		4.8		23.04	;	1
/*	91	*/			0	0	1	0	1	1	1	0	0	1	1	1	1	1	1	1	1	1	0	0	0	0	1	0	0			1		0		0		0		4.7		22.09	;	14
/*	92	*/			0	0	1	1	1	0	0	0	0	0	0	0	0	0	0	0	0	0	0	0	0	0	0	0	0			0		1		0		0		4.75		22.5625	;	3
/*	93	*/			0	0	1	1	1	0	0	0	0	0	0	0	0	0	0	0	0	0	0	0	0	0	0	0	0			1		0		0		0		5.25		27.5625	;	3
/*	94	*/			0	0	1	1	1	1	1	0	0	0	0	0	0	0	0	0	0	0	0	0	0	0	0	0	0			0		1		0		0		4.95		24.5025	;	5
/*	95	*/			0	0	1	0	0	0	0	0	0	0	0	0	0	0	0	0	0	0	0	0	0	0	0	0	0			1		0		0		0		5.05		25.5025	;	1
/*	96	*/			0	0	1	0	0	0	0	0	0	0	0	0	0	0	0	0	0	0	0	0	0	0	0	0	0			0		1		0		0		4.9		24.01	;	1
/*	97	*/			0	0	1	0	1	0	0	0	0	0	0	0	0	0	0	0	0	0	0	0	0	0	0	0	0			0		1		0		0		4.95		24.5025	;	2
/*	98	*/			0	0	1	1	0	0	0	0	0	0	0	0	0	0	0	0	0	0	0	0	0	0	0	0	0			0		0		0		1		4.15		17.2225	;	2
/*	99	*/			0	0	1	0	0	0	0	0	0	0	0	0	0	0	0	0	0	0	0	0	0	0	0	0	0			0		0		1		0		4.4		19.36	;	1
/*	100	*/			0	0	1	1	1	1	1	0	0	0	0	0	0	0	0	0	0	0	0	0	0	0	0	0	0			1		0		0		0		4.85		23.5225	;	5
/*	101	*/			0	0	1	0	0	0	0	0	0	0	0	0	0	0	0	0	0	0	0	0	0	0	0	0	0			0		1		0		0		5.05		25.5025	;	1
/*	102	*/			0	0	1	0	0	0	0	0	0	0	0	0	0	0	0	0	0	0	0	0	0	0	0	0	0			0		1		0		0		4.3		18.49	;	1
/*	103	*/			0	0	1	0	0	0	0	0	0	0	0	0	0	0	0	0	0	0	0	0	0	0	0	0	0			0		0		1		0		4.25		18.0625	;	1
/*	104	*/			0	0	1	1	0	0	0	0	0	0	0	0	0	0	0	0	0	0	0	0	0	0	0	0	0			0		1		0		0		4.9		24.01	;	2
/*	105	*/			0	0	1	1	0	0	0	0	0	0	0	0	0	0	0	0	0	0	0	0	0	0	0	0	0			0		1		0		0		4.55		20.7025	;	2
/*	106	*/			0	0	1	0	0	0	0	0	0	0	0	0	0	0	0	0	0	0	0	0	0	0	0	0	0			0		0		1		0		4		16	;	1
/*	107	*/			0	0	1	0	0	0	0	0	0	0	0	0	0	0	0	0	0	0	0	0	0	0	0	0	0			0		0		0		1		4.25		18.0625	;	1
/*	108	*/			0	0	1	0	0	0	0	0	0	0	0	0	0	0	0	0	0	0	0	0	0	0	0	0	0			1		0		0		0		4.6		21.16	;	1
/*	109	*/			0	0	1	1	1	0	0	0	0	1	0	0	0	0	0	0	0	1	1	0	0	0	0	0	0			1		0		0		0		4.8		23.04	;	6
/*	110	*/			0	0	1	1	1	0	0	0	0	0	0	0	0	0	0	0	0	0	0	0	0	0	0	0	0			0		1		0		0		4.6		21.16	;	3
/*	111	*/			0	0	1	0	0	0	0	0	1	1	0	0	0	0	0	0	0	0	0	0	0	0	0	0	0			0		1		0		0		4.35		18.9225	;	3
/*	128	*/			0	0	0	1	0	0	0	0	0	0	0	0	0	0	0	0	0	0	0	0	0	0	0	0	0			0		1		0		0		4.95		24.5025	;	1
/*	129	*/			0	0	0	1	0	0	0	0	0	0	0	0	0	0	0	0	0	0	0	0	0	0	0	0	0			0		1		0		0		5.1		26.01	;	1
/*	130	*/			0	0	0	1	1	1	1	0	1	1	0	1	1	1	1	1	0	0	0	0	0	0	0	0	0			1		0		0		0		4.9		24.01	;	11
/*	131	*/			0	0	0	1	0	1	0	0	0	0	0	0	0	0	0	0	0	0	0	0	0	0	0	0	0			0		1		0		0		5		25	;	2
/*	132	*/			0	0	0	1	0	0	0	0	0	0	0	0	0	1	0	1	1	0	0	0	1	1	0	0	0			0		0		0		1		4.15		17.2225	;	6
/*	133	*/			0	0	0	1	0	0	0	0	0	0	0	0	0	0	0	0	0	0	0	0	0	0	0	0	0			0		0		0		1		3.85		14.8225	;	1
/*	134	*/			0	0	0	1	1	0	1	0	1	1	0	1	0	1	0	1	0	1	1	1	1	1	0	1	0			0		1		0		0		4.9		24.01	;	14
/*	135	*/			0	0	0	1	1	1	1	0	1	1	0	1	0	1	0	0	0	0	0	0	0	0	0	0	0			1		0		0		0		4.95		24.5025	;	8
/*	136	*/			0	0	0	1	1	0	1	0	1	1	1	1	0	1	0	1	0	1	1	0	1	0	0	0	0			1		0		0		0		4.88		23.8144	;	12
/*	137	*/			0	0	0	1	0	0	0	0	0	0	0	0	0	0	0	0	0	0	0	0	0	0	0	0	0			0		0		0		1		4.5		20.25	;	1
/*	138	*/			0	0	0	1	0	0	0	0	0	0	0	0	0	0	0	0	0	0	0	0	0	0	0	0	0			0		0		0		1		4.45		19.8025	;	1
/*	139	*/			0	0	0	1	0	0	0	0	0	0	0	0	0	0	0	0	0	0	0	0	0	0	0	0	0			0		0		0		1		4.45		19.8025	;	1
/*	140	*/			0	0	0	1	0	0	0	0	0	0	0	0	0	0	0	0	0	0	0	0	0	0	0	0	0			0		1		0		0		4.9		24.01	;	1
/*	141	*/			0	0	0	1	1	1	0	0	1	0	0	1	0	1	1	1	1	1	1	1	1	1	1	1	0			1		0		0		0		4.75		22.5625	;	16
/*	142	*/			0	0	0	1	1	1	1	0	1	1	0	1	0	1	0	1	1	1	0	1	1	1	1	1	0			1		0		0		0		5		25	;	16
/*	143	*/			0	0	0	1	1	0	0	0	1	1	0	1	0	0	0	0	0	0	0	0	0	0	0	0	0			1		0		0		0		5		25	;	5
/*	144	*/			0	0	0	1	0	0	0	0	0	0	0	0	0	0	0	0	0	0	0	0	0	0	0	0	1			0		1		0		0		4.9		24.01	;	2
/*	145	*/			0	0	0	1	1	0	0	0	0	1	1	1	1	1	1	1	1	1	1	0	0	0	0	0	0			1		0		0		0		4.9		24.01	;	12
/*	146	*/			0	0	0	1	0	0	0	0	0	0	0	0	0	0	0	0	0	0	0	0	0	0	0	0	0			0		0		0		1		4		16	;	1
/*	147	*/			0	0	0	1	0	0	0	0	0	0	0	0	0	0	0	0	0	0	0	0	0	0	0	0	0			0		1		0		0		4.65		21.6225	;	1
/*	148	*/			0	0	0	1	0	0	0	0	0	0	0	0	0	0	0	0	0	0	0	0	0	0	0	0	0			0		0		0		1		4.35		18.9225	;	1
/*	149	*/			0	0	0	1	0	0	0	0	0	0	0	0	0	0	0	0	0	0	0	0	1	0	0	0	0			0		0		0		1		4.35		18.9225	;	2
/*	150	*/			0	0	0	1	0	0	0	0	0	0	0	0	0	0	0	0	0	0	0	0	0	0	0	0	0			0		0		0		1		4.2		17.64	;	1
/*	151	*/			0	0	0	1	0	0	0	0	0	0	0	0	0	0	1	0	0	0	0	0	0	0	0	0	0			0		0		1		0		4.4		19.36	;	2
/*	152	*/			0	0	0	1	0	0	0	0	0	0	0	0	0	0	0	0	0	0	0	0	0	0	0	0	0			0		1		0		0		4.95		24.5025	;	1
/*	153	*/			0	0	0	1	1	1	1	0	1	0	0	0	0	0	0	0	0	0	0	0	0	0	0	0	0			0		1		0		0		4.85		23.5225	;	5
/*	154	*/			0	0	0	1	1	1	1	0	0	0	0	0	0	0	0	0	0	0	0	0	0	0	0	0	0			1		0		0		0		4.75		22.5625	;	4
/*	155	*/			0	0	0	1	0	0	0	0	0	0	0	0	0	0	0	0	0	0	0	0	0	0	0	0	0			0		0		0		1		4.3		18.49	;	1
/*	156	*/			0	0	0	1	0	0	1	0	0	0	0	1	0	1	0	1	0	0	0	1	1	0	0	0	0			0		0		1		0		4.5		20.25	;	7
/*	157	*/			0	0	0	1	0	0	0	0	0	0	0	0	0	0	0	0	0	0	0	0	0	0	0	0	0			0		0		1		0		4.6		21.16	;	1
/*	158	*/			0	0	0	1	0	0	0	0	0	0	0	0	0	0	0	0	0	0	0	0	0	0	0	0	0			0		0		0		1		4.45		19.8025	;	1
/*	181	*/			0	0	0	0	0	1	0	0	0	0	0	0	0	0	0	0	0	0	0	0	0	0	0	0	0			0		0		1		0		4.35		18.9225	;	1
/*	182	*/			0	0	0	0	0	1	0	0	0	0	0	0	0	0	0	0	0	0	0	0	0	0	0	0	0			0		0		1		0		4.1		16.81	;	1
/*	183	*/			0	0	0	0	0	1	0	0	0	0	0	0	0	0	0	0	0	0	0	0	0	0	0	0	0			0		1		0		0		4.9		24.01	;	1
/*	184	*/			0	0	0	0	0	1	1	0	1	1	0	1	1	1	1	1	1	1	1	1	1	1	1	1	1			1		0		0		0		5.1		26.01	;	18
/*	185	*/			0	0	0	0	0	1	0	0	0	0	0	0	0	0	0	0	0	0	0	0	0	0	0	0	0			0		0		0		1		4.85		23.5225	;	1
/*	186	*/			0	0	0	0	0	1	1	0	1	0	1	1	1	1	1	1	1	1	1	1	1	0	0	1	0			1		0		0		0		5.15		26.5225	;	15
/*	187	*/			0	0	0	0	0	1	1	0	1	0	1	1	1	1	1	1	1	1	0	1	1	0	1	1	0			1		0		0		0		4.9		24.01	;	15
/*	188	*/			0	0	0	0	0	1	1	0	1	0	1	1	1	1	1	1	1	1	1	1	1	0	1	1	0			1		0		0		0		5.48		30.0304	;	16
/*	189	*/			0	0	0	0	0	1	0	0	0	0	0	0	0	0	0	0	0	0	0	0	0	0	0	0	0			0		0		1		0		4.45		19.8025	;	1
/*	190	*/			0	0	0	0	0	1	0	0	0	0	0	0	0	0	0	0	0	0	0	0	0	0	0	0	0			0		1		0		0		5		25	;	1
/*	191	*/			0	0	0	0	0	1	1	0	1	1	1	0	0	1	1	1	1	1	1	1	1	1	1	0	0			0		1		0		0		5		25	;	15
/*	192	*/			0	0	0	0	0	1	1	0	0	0	0	0	0	0	0	0	0	0	0	0	0	0	0	0	0			1		0		0		0		4.8		23.04	;	2
/*	193	*/			0	0	0	0	0	1	0	0	0	0	0	0	0	0	0	0	0	0	0	0	0	0	0	0	0			0		1		0		0		4.95		24.5025	;	1
/*	194	*/			0	0	0	0	0	1	0	0	0	0	0	0	0	0	0	0	0	0	0	0	0	0	0	0	0			0		1		0		0		4.7		22.09	;	1
/*	195	*/			0	0	0	0	0	1	0	0	0	0	0	0	0	0	1	0	1	1	0	0	0	1	0	0	0			1		0		0		0		4.8		23.04	;	5
/*	196	*/			0	0	0	0	0	1	0	0	0	0	0	0	0	0	0	0	0	0	0	0	0	0	0	0	0			0		1		0		0		4.95		24.5025	;	1
/*	197	*/			0	0	0	0	0	1	0	0	0	0	0	0	0	0	0	0	0	0	0	0	0	0	0	0	0			0		0		0		1		3.9		15.21	;	1
/*	198	*/			0	0	0	0	0	1	0	0	0	0	0	0	0	0	0	0	0	0	0	0	0	0	0	0	0			0		0		0		1		4.15		17.2225	;	1
/*	199	*/			0	0	0	0	0	1	1	0	0	0	0	0	0	0	0	0	0	0	0	0	0	0	0	0	0			0		1		0		0		4.85		23.5225	;	2
/*	200	*/			0	0	0	0	0	1	0	0	0	0	0	0	0	0	1	0	1	0	0	0	0	1	0	0	0			1		0		0		0		5		25	;	4
/*	201	*/			0	0	0	0	0	1	1	0	1	1	1	0	0	0	0	0	0	0	0	1	0	0	0	0	0			1		0		0		0		4.85		23.5225	;	6
/*	202	*/			0	0	0	0	0	1	0	0	0	0	0	0	0	0	1	0	1	0	0	0	0	0	0	0	0			0		1		0		0		5.2		27.04	;	3
/*	203	*/			0	0	0	0	0	1	0	0	0	0	0	0	0	0	0	0	0	0	0	0	0	0	0	0	0			0		0		0		1		4.1		16.81	;	1
/*	204	*/			0	0	0	0	0	1	0	0	0	0	0	0	0	0	0	0	0	0	0	0	0	0	0	0	0			0		1		0		0		4.9		24.01	;	1
/*	205	*/			0	0	0	0	0	1	0	0	0	0	0	0	0	0	0	0	0	0	0	0	0	0	0	0	0			0		1		0		0		4.95		24.5025	;	1
/*	206	*/			0	0	0	0	0	1	0	0	0	0	0	0	0	0	0	0	0	0	0	0	0	0	0	0	0			0		1		0		0		5		25	;	1
/*	207	*/			0	0	0	0	0	1	1	0	0	0	0	0	0	0	0	0	0	0	0	0	0	0	0	0	0			1		0		0		0		4.85		23.5225	;	2
/*	208	*/			0	0	0	0	0	1	0	0	0	0	0	0	1	0	0	0	0	0	0	0	0	0	0	0	0			0		1		0		0		4.9		24.01	;	2
/*	209	*/			0	0	0	0	0	1	0	0	0	0	0	0	0	0	0	0	0	0	0	0	0	0	0	0	0			0		1		0		0		4.9		24.01	;	1
/*	210	*/			0	0	0	0	0	1	0	0	0	1	1	1	0	1	1	1	1	1	0	1	0	0	0	0	0			1		0		0		0		5		25	;	10
/*	211	*/			0	0	0	0	0	1	0	0	0	0	0	0	0	0	0	0	0	0	0	0	0	0	0	0	0			0		0		0		1		4.1		16.81	;	1
/*	212	*/			0	0	0	0	0	1	0	0	0	0	0	0	0	0	0	0	0	0	0	0	0	0	0	0	0			0		0		0		1		3.95		15.6025	;	1
/*	222	*/			0	0	0	0	0	0	1	0	0	0	0	0	0	1	0	1	0	0	0	1	0	0	0	0	0			0		0		0		1		4.45		19.8025	;	4
/*	223	*/			0	0	0	0	0	0	1	0	0	0	0	0	0	0	0	0	0	0	0	0	0	0	0	0	0			0		0		0		1		4.1		16.81	;	1
/*	224	*/			0	0	0	0	0	0	1	0	0	0	0	0	0	0	0	0	0	0	0	0	0	0	0	0	0			0		0		0		1		4.15		17.2225	;	1
/*	225	*/			0	0	0	0	0	0	1	0	0	0	0	0	0	0	0	0	0	0	0	0	0	0	0	0	0			0		0		0		1		4.1		16.81	;	1
/*	226	*/			0	0	0	0	0	0	1	0	0	0	0	0	0	1	0	1	0	0	0	1	1	1	1	1	1			0		1		0		0		4.8		23.04	;	9
/*	227	*/			0	0	0	0	0	0	1	0	1	0	0	0	0	0	0	0	0	0	0	0	0	0	0	0	0			0		0		0		1		4.3		18.49	;	2
/*	228	*/			0	0	0	0	0	0	1	0	1	0	0	0	0	0	0	0	0	0	0	0	0	0	0	0	0			1		0		0		0		4.8		23.04	;	2
/*	229	*/			0	0	0	0	0	0	1	0	0	0	0	0	0	0	0	0	0	0	0	0	0	0	0	0	0			0		0		0		1		4.3		18.49	;	1
/*	230	*/			0	0	0	0	0	0	1	0	0	0	0	0	0	0	0	0	0	0	0	0	0	0	0	0	0			0		0		0		1		4.2		17.64	;	1
/*	231	*/			0	0	0	0	0	0	1	0	0	0	0	0	0	0	0	0	0	0	0	0	0	0	0	0	0			0		1		0		0		4.7		22.09	;	1
/*	232	*/			0	0	0	0	0	0	1	0	0	0	0	0	0	0	0	0	0	0	0	0	0	0	0	0	0			0		1		0		0		4.7		22.09	;	1
/*	233	*/			0	0	0	0	0	0	1	0	0	0	0	0	0	0	0	0	0	0	0	0	0	0	0	0	0			0		0		0		1		4.35		18.9225	;	1
/*	234	*/			0	0	0	0	0	0	1	0	0	0	1	0	0	1	1	0	1	1	1	1	1	1	0	0	0			0		1		0		0		4.65		21.6225	;	10
/*	235	*/			0	0	0	0	0	0	1	0	0	0	0	0	0	0	0	0	0	0	0	0	0	0	0	0	0			1		0		0		0		4.95		24.5025	;	1
/*	236	*/			0	0	0	0	0	0	1	0	0	0	0	0	0	0	0	0	0	0	0	0	0	0	0	0	0			0		1		0		0		4.9		24.01	;	1
/*	237	*/			0	0	0	0	0	0	1	0	0	0	0	0	0	0	0	0	0	0	0	0	0	0	0	0	0			0		0		0		1		4.15		17.2225	;	1
/*	238	*/			0	0	0	0	0	0	1	0	1	0	0	0	0	0	0	0	0	0	0	0	0	0	0	0	0			0		1		0		0		4.9		24.01	;	2
/*	239	*/			0	0	0	0	0	0	1	0	0	0	1	0	0	1	0	1	1	1	1	1	1	0	1	1	0			0		1		0		0		4.85		23.5225	;	11
/*	240	*/			0	0	0	0	0	0	1	0	0	0	0	0	0	0	0	0	0	0	0	0	0	0	0	0	0			0		1		0		0		4.9		24.01	;	1
/*	241	*/			0	0	0	0	0	0	1	0	0	0	0	0	0	0	0	0	0	0	0	0	0	0	0	0	0			0		0		0		1		4.2		17.64	;	1
/*	242	*/			0	0	0	0	0	0	1	0	0	0	0	0	0	0	0	0	0	0	0	0	0	0	0	0	0			0		0		0		1		4		16	;	1
/*	243	*/			0	0	0	0	0	0	0	1	0	0	0	0	0	0	0	0	0	0	1	1	1	1	0	0	0			0		0		0		1		4.1		16.81	;	5
/*	244	*/			0	0	0	0	0	0	0	1	0	0	0	0	0	0	0	0	0	1	0	0	0	0	0	0	0			0		0		1		0		4.5		20.25	;	2
/*	245	*/			0	0	0	0	0	0	0	1	0	0	0	0	0	0	0	0	0	0	0	0	0	0	0	0	0			0		0		0		1		3.95		15.6025	;	1
/*	246	*/			0	0	0	0	0	0	0	0	1	0	0	0	0	1	0	0	0	0	0	1	0	0	0	0	0			1		0		0		0		4.85		23.5225	;	3
/*	247	*/			0	0	0	0	0	0	0	0	1	0	0	0	0	0	0	0	0	0	0	0	0	0	0	0	0			0		1		0		0		5		25	;	1
/*	248	*/			0	0	0	0	0	0	0	0	1	0	1	1	1	0	1	1	1	1	1	1	0	0	0	0	0			1		0		0		0		5		25	;	10
/*	249	*/			0	0	0	0	0	0	0	0	1	0	0	0	0	0	0	0	0	0	0	0	0	0	0	0	0			0		0		0		1		4.3		18.49	;	1
/*	250	*/			0	0	0	0	0	0	0	0	1	1	0	0	0	0	0	0	0	0	0	0	0	0	0	0	0			0		0		0		1		4.25		18.0625	;	2
/*	251	*/			0	0	0	0	0	0	0	0	1	0	0	0	0	0	0	0	0	0	0	0	0	0	0	0	0			1		0		0		0		4.8		23.04	;	1
/*	252	*/			0	0	0	0	0	0	0	0	1	0	1	0	0	0	0	0	0	0	0	0	0	0	0	0	0			0		0		0		1		4.05		16.4025	;	2
/*	253	*/			0	0	0	0	0	0	0	0	1	1	0	0	0	1	0	0	0	0	0	0	0	0	0	0	0			0		1		0		0		5.1		26.01	;	3
/*	254	*/			0	0	0	0	0	0	0	0	1	0	0	0	1	0	0	0	0	0	0	0	0	0	0	0	0			0		1		0		0		4.9		24.01	;	2
/*	255	*/			0	0	0	0	0	0	0	0	1	0	0	0	0	0	0	0	0	0	0	0	0	0	0	0	0			0		0		0		1		4		16	;	1
/*	256	*/			0	0	0	0	0	0	0	0	1	0	0	0	0	0	0	0	0	0	0	1	0	0	0	0	0			0		1		0		0		4.7		22.09	;	2
/*	257	*/			0	0	0	0	0	0	0	0	1	0	0	0	0	0	0	0	0	0	0	0	0	0	0	0	0			0		1		0		0		4.65		21.6225	;	1
/*	258	*/			0	0	0	0	0	0	0	0	1	0	0	0	0	0	0	0	0	0	0	0	0	0	0	0	0			0		1		0		0		4.8		23.04	;	1
/*	259	*/			0	0	0	0	0	0	0	0	1	0	0	0	0	0	0	0	0	0	0	0	0	0	0	0	0			0		1		0		0		4.95		24.5025	;	1
/*	260	*/			0	0	0	0	0	0	0	0	1	0	0	0	0	0	0	0	0	0	0	0	0	0	0	1	0			1		0		0		0		4.95		24.5025	;	2
/*	261	*/			0	0	0	0	0	0	0	0	1	0	0	0	0	0	0	0	0	0	0	0	0	1	0	0	0			0		0		0		1		4.15		17.2225	;	2
/*	262	*/			0	0	0	0	0	0	0	0	1	0	0	0	0	0	0	0	0	0	0	0	0	0	0	0	0			0		0		0		1		3.85		14.8225	;	1
/*	263	*/			0	0	0	0	0	0	0	0	1	0	0	0	0	0	0	0	0	0	0	0	0	0	0	0	0			0		0		0		1		4		16	;	1
/*	264	*/			0	0	0	0	0	0	0	0	1	0	0	0	0	0	0	0	0	0	0	0	0	0	0	0	0			0		1		0		0		4.55		20.7025	;	1
/*	265	*/			0	0	0	0	0	0	0	0	1	0	0	0	0	0	0	0	0	0	0	0	0	0	0	0	0			0		0		0		1		4		16	;	1
/*	266	*/			0	0	0	0	0	0	0	0	1	0	0	0	0	0	0	0	0	0	0	0	0	0	0	0	0			1		0		0		0		4.95		24.5025	;	1
/*	267	*/			0	0	0	0	0	0	0	0	1	0	0	0	0	0	1	0	0	0	0	0	0	0	0	0	0			0		1		0		0		4.5		20.25	;	2
/*	268	*/			0	0	0	0	0	0	0	0	1	1	0	0	0	0	0	0	1	0	0	0	0	1	0	0	0			0		1		0		0		5		25	;	4
/*	269	*/			0	0	0	0	0	0	0	0	1	1	1	1	0	1	0	1	0	0	1	1	1	1	1	1	1			0		1		0		0		4.75		22.5625	;	13
/*	270	*/			0	0	0	0	0	0	0	0	0	1	1	1	1	1	1	1	0	1	1	0	0	0	0	0	0			1		0		0		0		5.15		26.5225	;	9
/*	271	*/			0	0	0	0	0	0	0	0	0	1	0	0	0	0	0	0	0	0	1	0	1	1	0	0	0			0		0		0		1		4		16	;	4
/*	272	*/			0	0	0	0	0	0	0	0	0	1	1	1	1	1	1	1	1	1	1	1	1	0	1	1	0			0		1		0		0		4.85		23.5225	;	14
/*	273	*/			0	0	0	0	0	0	0	0	0	1	0	0	0	0	1	1	1	1	0	0	0	1	0	0	0			0		1		0		0		4.85		23.5225	;	6
/*	274	*/			0	0	0	0	0	0	0	0	0	1	0	0	0	1	0	0	0	0	0	0	0	0	0	0	0			1		0		0		0		4.85		23.5225	;	2
/*	275	*/			0	0	0	0	0	0	0	0	0	1	0	0	0	0	0	0	0	0	0	1	0	0	0	1	0			0		0		0		1		4.45		19.8025	;	3
/*	276	*/			0	0	0	0	0	0	0	0	0	1	0	0	0	0	0	0	0	0	0	0	0	0	0	0	0			0		0		0		1		4.08		16.6464	;	1
/*	277	*/			0	0	0	0	0	0	0	0	0	1	0	0	0	1	0	0	0	0	0	0	0	0	0	0	0			0		1		0		0		4.7		22.09	;	2
/*	278	*/			0	0	0	0	0	0	0	0	0	1	1	0	0	1	0	0	1	1	0	1	1	1	1	1	1			0		1		0		0		5		25	;	11
/*	279	*/			0	0	0	0	0	0	0	0	0	1	0	0	0	0	0	0	0	0	0	0	0	0	0	0	0			0		0		1		0		4.5		20.25	;	1
/*	280	*/			0	0	0	0	0	0	0	0	0	1	0	0	0	0	0	0	0	0	0	0	0	0	0	0	0			0		1		0		0		4.92		24.2064	;	1
/*	281	*/			0	0	0	0	0	0	0	0	0	1	0	1	0	0	0	0	0	0	0	0	0	0	0	0	1			1		0		0		0		4.8		23.04	;	3
/*	282	*/			0	0	0	0	0	0	0	0	0	0	1	0	1	1	1	1	1	1	0	1	0	0	0	1	1			1		0		0		0		4.7		22.09	;	10
/*	283	*/			0	0	0	0	0	0	0	0	0	0	1	0	0	0	0	0	0	0	0	0	0	0	0	0	0			0		0		0		1		4		16	;	1
/*	284	*/			0	0	0	0	0	0	0	0	0	0	1	0	0	0	0	1	0	1	0	0	0	0	0	0	0			0		1		0		0		4.7		22.09	;	3
/*	285	*/			0	0	0	0	0	0	0	0	0	0	1	0	0	0	0	0	0	0	0	0	0	0	0	0	0			0		0		0		1		4.1		16.81	;	1
/*	286	*/			0	0	0	0	0	0	0	0	0	0	1	0	0	1	1	1	0	0	0	0	0	0	0	0	0			0		1		0		0		4.95		24.5025	;	4
/*	287	*/			0	0	0	0	0	0	0	0	0	0	1	0	0	0	0	0	0	0	0	0	0	0	0	0	0			0		1		0		0		4.7		22.09	;	1
/*	288	*/			0	0	0	0	0	0	0	0	0	0	1	0	0	0	0	0	0	0	0	0	0	0	0	0	0			0		0		1		0		4.6		21.16	;	1
/*	289	*/			0	0	0	0	0	0	0	0	0	0	1	0	0	0	0	0	0	0	0	0	0	0	0	0	0			0		0		0		1		4.1		16.81	;	1
/*	290	*/			0	0	0	0	0	0	0	0	0	0	1	0	0	0	0	0	0	0	0	0	0	0	0	0	0			0		0		0		1		4.5		20.25	;	1
/*	291	*/			0	0	0	0	0	0	0	0	0	0	1	1	0	1	0	0	0	0	0	0	0	0	0	0	0			0		0		0		1		4.1		16.81	;	3
/*	292	*/			0	0	0	0	0	0	0	0	0	0	1	0	0	1	0	1	0	0	1	1	0	1	0	0	0			0		0		1		0		4.55		20.7025	;	6
/*	293	*/			0	0	0	0	0	0	0	0	0	0	1	0	0	0	0	0	0	0	0	0	0	0	0	0	0			0		1		0		0		4.7		22.09	;	1
/*	294	*/			0	0	0	0	0	0	0	0	0	0	0	1	0	0	0	0	0	0	1	1	1	0	1	1	1			0		1		0		0		4.8		23.04	;	7
/*	295	*/			0	0	0	0	0	0	0	0	0	0	0	1	0	1	0	0	0	1	1	0	0	0	0	0	0			0		1		0		0		4.9		24.01	;	4
/*	296	*/			0	0	0	0	0	0	0	0	0	0	0	1	0	0	0	0	0	0	0	0	0	0	0	0	0			0		0		0		1		4.3		18.49	;	1
/*	297	*/			0	0	0	0	0	0	0	0	0	0	0	1	0	0	0	0	0	0	0	0	0	0	0	0	0			0		0		0		1		4.45		19.8025	;	1
/*	298	*/			0	0	0	0	0	0	0	0	0	0	0	1	0	0	1	0	1	0	0	0	0	1	0	1	0			1		0		0		0		4.9		24.01	;	5
/*	299	*/			0	0	0	0	0	0	0	0	0	0	0	1	0	0	0	0	0	0	0	0	0	0	0	0	0			0		0		0		1		4.1		16.81	;	1
/*	300	*/			0	0	0	0	0	0	0	0	0	0	0	1	0	0	0	0	1	1	1	0	1	1	1	1	0			1		0		0		0		4.7		22.09	;	8
/*	301	*/			0	0	0	0	0	0	0	0	0	0	0	1	0	0	0	0	0	0	0	0	0	0	0	0	0			0		0		0		1		4.4		19.36	;	1
/*	302	*/			0	0	0	0	0	0	0	0	0	0	0	1	0	0	0	0	0	0	0	0	0	0	0	0	0			0		0		0		1		4.3		18.49	;	1
/*	303	*/			0	0	0	0	0	0	0	0	0	0	0	1	0	0	0	0	0	0	0	1	0	1	0	0	0			0		1		0		0		4.75		22.5625	;	3
/*	304	*/			0	0	0	0	0	0	0	0	0	0	0	1	0	0	0	0	0	0	0	0	0	0	0	0	0			0		0		1		0		4.4		19.36	;	1
/*	305	*/			0	0	0	0	0	0	0	0	0	0	0	1	0	0	0	0	0	0	0	0	0	0	0	0	0			0		0		0		1		4.25		18.0625	;	1
/*	306	*/			0	0	0	0	0	0	0	0	0	0	0	1	0	0	0	0	0	0	0	0	0	0	0	0	0			0		0		0		1		4		16	;	1
/*	307	*/			0	0	0	0	0	0	0	0	0	0	0	1	0	0	0	0	0	0	0	0	0	1	0	0	0			0		1		0		0		4.85		23.5225	;	2
/*	308	*/			0	0	0	0	0	0	0	0	0	0	0	1	0	0	0	0	0	0	0	0	0	0	0	0	0			0		0		0		1		3.95		15.6025	;	1
/*	309	*/			0	0	0	0	0	0	0	0	0	0	0	1	0	0	0	0	0	0	1	0	0	0	0	0	0			0		0		0		1		4.2		17.64	;	2
/*	310	*/			0	0	0	0	0	0	0	0	0	0	0	0	1	0	0	1	0	1	0	1	1	1	1	0	0			0		1		0		0		4.7		22.09	;	7
/*	311	*/			0	0	0	0	0	0	0	0	0	0	0	0	1	1	0	0	0	0	0	0	0	0	0	0	0			0		0		0		1		4.1		16.81	;	2
/*	312	*/			0	0	0	0	0	0	0	0	0	0	0	0	1	1	1	0	0	1	1	1	1	0	1	0	1			0		1		0		0		4.85		23.5225	;	9
/*	313	*/			0	0	0	0	0	0	0	0	0	0	0	0	1	0	0	0	0	0	0	0	0	0	0	0	0			0		0		0		1		4.2		17.64	;	1
/*	314	*/			0	0	0	0	0	0	0	0	0	0	0	0	1	0	0	0	0	0	0	0	0	0	0	0	0			0		0		0		1		4.1		16.81	;	1
/*	315	*/			0	0	0	0	0	0	0	0	0	0	0	0	1	0	0	0	0	0	0	0	0	0	0	0	0			0		1		0		0		5		25	;	1
/*	316	*/			0	0	0	0	0	0	0	0	0	0	0	0	1	0	0	0	0	0	0	0	0	0	0	0	0			0		0		0		1		4		16	;	1
/*	317	*/			0	0	0	0	0	0	0	0	0	0	0	0	1	1	1	0	1	1	1	0	0	0	0	0	0			1		0		0		0		4.75		22.5625	;	6
/*	318	*/			0	0	0	0	0	0	0	0	0	0	0	0	1	0	0	0	0	0	0	0	0	0	0	0	0			0		1		0		0		5.1		26.01	;	1
/*	319	*/			0	0	0	0	0	0	0	0	0	0	0	0	1	0	0	0	0	0	0	0	0	0	0	0	0			0		1		0		0		5		25	;	1
/*	320	*/			0	0	0	0	0	0	0	0	0	0	0	0	1	0	0	0	0	0	0	0	1	0	0	0	0			0		0		0		1		3.95		15.6025	;	2
/*	321	*/			0	0	0	0	0	0	0	0	0	0	0	0	1	1	0	0	0	1	0	1	0	0	0	0	1			0		0		1		0		4.6		21.16	;	5
/*	322	*/			0	0	0	0	0	0	0	0	0	0	0	0	1	1	0	0	0	0	0	1	1	0	1	1	1			0		1		0		0		4.7		22.09	;	7
/*	323	*/			0	0	0	0	0	0	0	0	0	0	0	0	1	0	0	0	0	0	0	0	0	0	0	0	0			0		0		0		1		4.3		18.49	;	1
/*	324	*/			0	0	0	0	0	0	0	0	0	0	0	0	1	1	0	1	0	1	0	0	0	0	0	0	0			0		1		0		0		4.8		23.04	;	4
/*	325	*/			0	0	0	0	0	0	0	0	0	0	0	0	1	0	0	0	0	0	0	0	0	0	0	0	0			0		0		0		1		4		16	;	1
/*	326	*/			0	0	0	0	0	0	0	0	0	0	0	0	1	1	1	1	1	1	1	1	1	1	0	1	0			1		0		0		0		4.75		22.5625	;	11
/*	327	*/			0	0	0	0	0	0	0	0	0	0	0	0	1	0	1	0	0	0	0	0	0	0	0	0	0			1		0		0		0		4.8		23.04	;	2
/*	328	*/			0	0	0	0	0	0	0	0	0	0	0	0	1	1	0	0	0	0	0	0	0	0	0	0	0			0		1		0		0		4.55		20.7025	;	2
/*	329	*/			0	0	0	0	0	0	0	0	0	0	0	0	0	1	0	1	0	1	1	0	1	0	0	1	1			1		0		0		0		4.85		23.5225	;	7
/*	330	*/			0	0	0	0	0	0	0	0	0	0	0	0	0	1	1	1	1	1	0	1	1	1	1	1	1			1		0		0		0		5.05		25.5025	;	11
/*	331	*/			0	0	0	0	0	0	0	0	0	0	0	0	0	1	0	0	0	0	0	0	0	0	0	0	0			0		0		0		1		4.25		18.0625	;	1
/*	332	*/			0	0	0	0	0	0	0	0	0	0	0	0	0	1	0	0	0	0	0	0	0	0	0	0	0			0		1		0		0		4.85		23.5225	;	1
/*	333	*/			0	0	0	0	0	0	0	0	0	0	0	0	0	1	0	0	0	0	0	0	0	0	0	0	0			0		1		0		0		4.85		23.5225	;	1
/*	334	*/			0	0	0	0	0	0	0	0	0	0	0	0	0	1	0	0	1	0	0	1	0	0	0	0	0			0		1		0		0		4.7		22.09	;	3
/*	335	*/			0	0	0	0	0	0	0	0	0	0	0	0	0	1	0	0	0	0	0	0	0	0	0	0	0			0		0		0		1		4.2		17.64	;	1
/*	336	*/			0	0	0	0	0	0	0	0	0	0	0	0	0	0	0	1	1	1	1	0	0	0	0	0	0			1		0		0		0		4.85		23.5225	;	4
/*	337	*/			0	0	0	0	0	0	0	0	0	0	0	0	0	0	0	1	1	0	0	0	0	0	0	0	0			0		1		0		0		4.5		20.25	;	2
/*	338	*/			0	0	0	0	0	0	0	0	0	0	0	0	0	0	0	1	0	1	1	0	0	1	1	1	0			0		1		0		0		5.13		26.3169	;	6
/*	339	*/			0	0	0	0	0	0	0	0	0	0	0	0	0	0	0	1	1	0	1	1	1	1	0	0	1			0		1		0		0		4.89		23.9121	;	7
/*	340	*/			0	0	0	0	0	0	0	0	0	0	0	0	0	0	0	1	0	1	1	0	0	0	0	0	0			1		0		0		0		4.7		22.09	;	3
/*	341	*/			0	0	0	0	0	0	0	0	0	0	0	0	0	0	0	1	0	0	0	0	0	0	0	0	0			0		1		0		0		4.7		22.09	;	1
/*	342	*/			0	0	0	0	0	0	0	0	0	0	0	0	0	0	0	1	0	0	0	0	0	0	0	0	0			0		1		0		0		4.8		23.04	;	1
/*	343	*/			0	0	0	0	0	0	0	0	0	0	0	0	0	0	0	1	0	0	0	0	0	0	0	0	0			0		1		0		0		4.75		22.5625	;	1
/*	344	*/			0	0	0	0	0	0	0	0	0	0	0	0	0	0	0	1	1	0	1	0	0	0	0	0	0			0		1		0		0		4.9		24.01	;	3
/*	345	*/			0	0	0	0	0	0	0	0	0	0	0	0	0	0	0	1	1	0	1	0	1	1	1	1	1			0		1		0		0		4.62		21.3444	;	8
/*	346	*/			0	0	0	0	0	0	0	0	0	0	0	0	0	0	0	0	1	1	0	1	0	0	1	0	1			0		1		0		0		4.55		20.7025	;	5
/*	347	*/			0	0	0	0	0	0	0	0	0	0	0	0	0	0	0	0	1	0	0	0	0	0	0	0	0			0		1		0		0		4.69		21.9961	;	1
/*	348	*/			0	0	0	0	0	0	0	0	0	0	0	0	0	0	0	0	1	0	0	0	0	0	0	0	0			0		0		0		1		4.3		18.49	;	1
/*	349	*/			0	0	0	0	0	0	0	0	0	0	0	0	0	0	0	0	1	0	0	0	0	0	0	0	0			0		0		0		1		4.5		20.25	;	1
/*	350	*/			0	0	0	0	0	0	0	0	0	0	0	0	0	0	0	0	1	0	0	0	0	0	0	0	0			0		0		0		1		4.15		17.2225	;	1
/*	351	*/			0	0	0	0	0	0	0	0	0	0	0	0	0	0	0	0	1	0	0	0	0	0	0	0	0			0		1		0		0		4.99		24.9001	;	1
/*	352	*/			0	0	0	0	0	0	0	0	0	0	0	0	0	0	0	0	1	0	1	0	0	0	0	0	0			0		1		0		0		4.55		20.7025	;	2
/*	353	*/			0	0	0	0	0	0	0	0	0	0	0	0	0	0	0	0	1	0	0	0	0	0	0	0	0			0		1		0		0		5		25	;	1
/*	354	*/			0	0	0	0	0	0	0	0	0	0	0	0	0	0	0	0	1	0	0	0	0	0	0	0	0			0		1		0		0		4.7		22.09	;	1
/*	355	*/			0	0	0	0	0	0	0	0	0	0	0	0	0	0	0	0	1	0	0	0	0	0	0	0	0			0		1		0		0		4.95		24.5025	;	1
/*	365	*/			0	0	0	0	0	0	0	0	0	0	0	0	0	0	0	0	0	1	0	0	0	0	0	0	0			0		1		0		0		4.3		18.49	;	1
/*	366	*/			0	0	0	0	0	0	0	0	0	0	0	0	0	0	0	0	0	1	0	0	0	0	0	0	0			0		0		0		1		4.5		20.25	;	1
/*	367	*/			0	0	0	0	0	0	0	0	0	0	0	0	0	0	0	0	0	1	0	0	0	0	0	0	0			0		0		0		1		4.3		18.49	;	1
/*	368	*/			0	0	0	0	0	0	0	0	0	0	0	0	0	0	0	0	0	1	0	0	0	0	0	0	0			0		0		0		1		4.28		18.3184	;	1
/*	369	*/			0	0	0	0	0	0	0	0	0	0	0	0	0	0	0	0	0	1	0	1	0	0	0	0	0			0		0		0		1		4.05		16.4025	;	2
/*	370	*/			0	0	0	0	0	0	0	0	0	0	0	0	0	0	0	0	0	1	0	0	0	0	0	0	0			0		1		0		0		4.95		24.5025	;	1
/*	371	*/			0	0	0	0	0	0	0	0	0	0	0	0	0	0	0	0	0	1	1	1	1	0	0	1	1			0		1		0		0		5.1		26.01	;	6
/*	372	*/			0	0	0	0	0	0	0	0	0	0	0	0	0	0	0	0	0	1	1	0	0	0	0	1	0			0		1		0		0		4.8		23.04	;	3
/*	373	*/			0	0	0	0	0	0	0	0	0	0	0	0	0	0	0	0	0	1	1	1	1	1	1	1	1			0		1		0		0		4.92		24.2064	;	8
/*	374	*/			0	0	0	0	0	0	0	0	0	0	0	0	0	0	0	0	0	1	0	0	0	0	0	0	0			0		0		0		1		4		16	;	1
/*	375	*/			0	0	0	0	0	0	0	0	0	0	0	0	0	0	0	0	0	1	0	0	0	1	0	0	0			0		0		0		1		4.1		16.81	;	2
/*	376	*/			0	0	0	0	0	0	0	0	0	0	0	0	0	0	0	0	0	1	0	1	1	1	1	1	0			0		1		0		0		5		25	;	6
/*	377	*/			0	0	0	0	0	0	0	0	0	0	0	0	0	0	0	0	0	0	1	0	0	0	0	0	0			0		0		0		1		4.4		19.36	;	1
/*	378	*/			0	0	0	0	0	0	0	0	0	0	0	0	0	0	0	0	0	0	1	0	0	0	0	0	0			1		0		0		0		4.8		23.04	;	1
/*	379	*/			0	0	0	0	0	0	0	0	0	0	0	0	0	0	0	0	0	0	1	1	0	0	0	0	0			1		0		0		0		4.95		24.5025	;	2
/*	380	*/			0	0	0	0	0	0	0	0	0	0	0	0	0	0	0	0	0	0	1	1	0	0	0	0	0			0		1		0		0		4.8		23.04	;	2
/*	381	*/			0	0	0	0	0	0	0	0	0	0	0	0	0	0	0	0	0	0	1	0	0	0	0	0	0			0		1		0		0		4.8		23.04	;	1
/*	382	*/			0	0	0	0	0	0	0	0	0	0	0	0	0	0	0	0	0	0	1	0	0	0	0	0	0			0		0		0		1		4.2		17.64	;	1
/*	383	*/			0	0	0	0	0	0	0	0	0	0	0	0	0	0	0	0	0	0	1	1	1	1	1	1	1			1		0		0		0		5.1		26.01	;	7
/*	384	*/			0	0	0	0	0	0	0	0	0	0	0	0	0	0	0	0	0	0	1	0	0	0	0	0	0			0		1		0		0		4.9		24.01	;	1
/*	385	*/			0	0	0	0	0	0	0	0	0	0	0	0	0	0	0	0	0	0	1	0	0	0	0	0	0			0		1		0		0		4.85		23.5225	;	1
/*	386	*/			0	0	0	0	0	0	0	0	0	0	0	0	0	0	0	0	0	0	1	0	0	0	0	0	0			0		1		0		0		4.9		24.01	;	1
/*	387	*/			0	0	0	0	0	0	0	0	0	0	0	0	0	0	0	0	0	0	0	1	0	0	0	0	0			0		0		0		1		4.1		16.81	;	1
/*	388	*/			0	0	0	0	0	0	0	0	0	0	0	0	0	0	0	0	0	0	0	1	0	0	0	0	0			0		0		0		1		4.2		17.64	;	1
/*	389	*/			0	0	0	0	0	0	0	0	0	0	0	0	0	0	0	0	0	0	0	1	1	0	0	1	1			1		0		0		0		4.5		20.25	;	4
/*	390	*/			0	0	0	0	0	0	0	0	0	0	0	0	0	0	0	0	0	0	0	1	0	0	0	0	0			0		0		0		1		3.9		15.21	;	1
/*	391	*/			0	0	0	0	0	0	0	0	0	0	0	0	0	0	0	0	0	0	0	1	0	0	0	0	0			0		0		0		1		4.2		17.64	;	1
/*	392	*/			0	0	0	0	0	0	0	0	0	0	0	0	0	0	0	0	0	0	0	1	0	0	0	0	0			0		1		0		0		4.8		23.04	;	1
/*	393	*/			0	0	0	0	0	0	0	0	0	0	0	0	0	0	0	0	0	0	0	1	0	1	0	0	0			0		1		0		0		4.9		24.01	;	2
/*	394	*/			0	0	0	0	0	0	0	0	0	0	0	0	0	0	0	0	0	0	0	1	0	0	0	0	1			0		0		0		1		4.18		17.4724	;	2
/*	395	*/			0	0	0	0	0	0	0	0	0	0	0	0	0	0	0	0	0	0	0	1	0	0	0	0	0			0		0		0		1		4.2		17.64	;	1
/*	396	*/			0	0	0	0	0	0	0	0	0	0	0	0	0	0	0	0	0	0	0	1	0	0	0	0	0			0		0		0		1		4.1		16.81	;	1
/*	397	*/			0	0	0	0	0	0	0	0	0	0	0	0	0	0	0	0	0	0	0	1	0	1	0	0	0			0		0		0		1		4.18		17.4724	;	2
/*	398	*/			0	0	0	0	0	0	0	0	0	0	0	0	0	0	0	0	0	0	0	1	0	0	0	0	0			0		1		0		0		5		25	;	1
/*	399	*/			0	0	0	0	0	0	0	0	0	0	0	0	0	0	0	0	0	0	0	0	1	0	1	1	1			0		1		0		0		4.7		22.09	;	4
/*	400	*/			0	0	0	0	0	0	0	0	0	0	0	0	0	0	0	0	0	0	0	0	1	1	0	0	0			1		0		0		0		5		25	;	2
/*	401	*/			0	0	0	0	0	0	0	0	0	0	0	0	0	0	0	0	0	0	0	0	1	1	1	1	0			0		1		0		0		5.1		26.01	;	4
/*	402	*/			0	0	0	0	0	0	0	0	0	0	0	0	0	0	0	0	0	0	0	0	1	0	0	0	0			0		0		0		1		4.2		17.64	;	1
/*	403	*/			0	0	0	0	0	0	0	0	0	0	0	0	0	0	0	0	0	0	0	0	0	1	1	0	0			0		0		1		0		4.3		18.49	;	2
/*	404	*/			0	0	0	0	0	0	0	0	0	0	0	0	0	0	0	0	0	0	0	0	0	1	0	0	0			0		0		0		1		4.2		17.64	;	1
/*	405	*/			0	0	0	0	0	0	0	0	0	0	0	0	0	0	0	0	0	0	0	0	0	1	1	0	0			0		1		0		0		4.6		21.16	;	2
/*	406	*/			0	0	0	0	0	0	0	0	0	0	0	0	0	0	0	0	0	0	0	0	0	1	0	0	0			0		0		0		1		3.95		15.6025	;	1
/*	407	*/			0	0	0	0	0	0	0	0	0	0	0	0	0	0	0	0	0	0	0	0	0	1	0	0	0			0		0		1		0		4.35		18.9225	;	1
/*	408	*/			0	0	0	0	0	0	0	0	0	0	0	0	0	0	0	0	0	0	0	0	0	1	0	0	0			0		1		0		0		4.6		21.16	;	1
/*	409	*/			0	0	0	0	0	0	0	0	0	0	0	0	0	0	0	0	0	0	0	0	0	1	0	0	0			0		0		0		1		4.2		17.64	;	1
/*	410	*/			0	0	0	0	0	0	0	0	0	0	0	0	0	0	0	0	0	0	0	0	0	1	0	0	0			0		0		1		0		4.3		18.49	;	1
/*	411	*/			0	0	0	0	0	0	0	0	0	0	0	0	0	0	0	0	0	0	0	0	0	1	0	0	0			0		1		0		0		4.9		24.01	;	1
/*	412	*/			0	0	0	0	0	0	0	0	0	0	0	0	0	0	0	0	0	0	0	0	0	1	0	0	0			1		0		0		0		5		25	;	1
/*	413	*/			0	0	0	0	0	0	0	0	0	0	0	0	0	0	0	0	0	0	0	0	0	0	1	0	0			0		1		0		0		4.6		21.16	;	1
/*	414	*/			0	0	0	0	0	0	0	0	0	0	0	0	0	0	0	0	0	0	0	0	0	0	1	0	0			0		1		0		0		4.75		22.5625	;	1
/*	415	*/			0	0	0	0	0	0	0	0	0	0	0	0	0	0	0	0	0	0	0	0	0	0	0	0	1			1		0		0		0		4.9		24.01	;	1
/*	416	*/			0	0	0	0	0	0	0	0	0	0	0	0	0	0	0	0	0	0	0	0	0	0	0	0	1			1		0		0		0		5.05		25.5025	;	1
/*	417	*/			0	0	0	0	0	0	0	0	0	0	0	0	0	0	0	0	0	0	0	0	0	0	0	0	1			0		1		0		0		4.7		22.09	;	1
/*	418	*/			0	0	0	0	0	0	0	0	0	0	0	0	0	0	0	0	0	0	0	0	0	0	0	0	1			0		0		1		0		4.5		20.25	;	1
/*	419	*/			0	0	0	0	0	0	0	0	0	0	0	0	0	0	0	0	0	0	0	0	0	0	0	0	1			1		0		0		0		4.7		22.09	;	1

## Sheet: Treatments
Specimen	initial status territorial (D/S)	initial territory	Treatment	0-1	0-1 (recodificar el FT)	1-2	1-2 (recodificar el FT)	Territory on day 1	0-2	0-2 (recodificar el FT)	2-3	2-3 (recodificar el FT)	Territory on day 2	0-3	0-3(recodificar el FT)	1-3	1-3( recodificar el FT)	Territory on day 3
89	S	T1	EMB	0	0	2	0	T1	2	0	2	0	FT	2	0	2	0	FT
201	D	T2	EMB	0	0	1	1	T2	1	1	0	0	T1	1	1	1	1	T6
272	S	T3	AMN	0	0	0	0	T12	0	0	0	0	T12	0	0	0	0	T12
278	D	T4	AMN	2	1	2	0	FT	2	1	0	0	FT	1	1	0	0	T4
153	S	T5	control 2	2	0	2	0	FT	2	0	2	0	FT	2	0	2	0	FT
135	D	T6	control 2	0	0	0	0	T6	0	0			T6	MUERTO				T6
286	D	T7	control 1	0	0	0	0	T7	0	0	2	1	T7	2	1	2	1	FT
76	S	T8	control 1	0	0	2	0	T8	2	0	2	0	FT	2	0	2	0	FT
188	D	T9	control 2	0	0	0	0	T9	0	0	0	0	T9	0	0	0	0	T9
326	S	T10	control 2	0	0	0	0	T10	0	0	0	0	T10	0	0	0	0	T10
186	D	T11	EMB	0	0	0	0	T11	0	0	0	0	T11	0	0	0	0	T11
342	S	T12	EMB	2	0	2	0	FT	2	0	2	0	FT	2	0	2	0	FT
344	S	T13	control 1	2	0	0	0	FT	0	0	0	0	T13	0	0	0	0	T13
210	D	T14	control 1	0	0	0	0	T14	0	0	0	0	T14	0	0	0	0	T14
187	D	T15	AMN	0	0	0	0	T15	0	0	0	0	T15	0	0	0	0	T15
239	S	T16	AMN	2	0	2	0	FT	2	0	0	0	FT	0	0	0	0	T16
273	S	T1	control 1	2	0	2	0	FT	2	0	2	0	FT	2	0	2	0	FT
270	D	T2	control 1	0	0	2	0	T1	2	1	2	0	FT	2	1	2	1	FT
300	D	T3	AMN	2	1	1	1	FT	0	0	0	0	T3	0	0	0	0	T3
243	S	T4	AMN	2	0	0	0	FT	0	0	0	0	T4	0	0	0	0	T4
136	D	T5	control 2	2	1	2	0	FT	2	1	2	0	FT	2	1	2	1	FT
312	S	T6	control 2	0	0	2	0	T6	2	0	2	0	FT	2	0	2	0	FT
401	S	T7	EMB	0	0	0	0	T7	0	0	0	0	T7	0	0	0	0	T7
184	D	T8	EMB	0	0	0	0	T8	0	0	0	0	T8	0	0	0	0	T8
141	D	T10	AMN	0	0	0	0	T10	0	0	1	1	T10	1	1	1	1	T10
373	S	T12	AMN	0	0	0	0	T8	0	0	1	1	T8	1	1	1	1	T12
294	D	T13	control 1	0	0	0	0	T13	0	0	0	0	T13	0	0	0	0	T13
345	S	T14	control 1	0	0	0	0	T15	0	0	1	1	T14	1	1	1	1	T14
142	D	T16	control 2	0	0	0	0	T16	0	0	1	1	T16	1	1	1	1	T14
376	S	T1	control 2	0	0	1	1	T1	1	1	0	0	T2	1	1	1	1	T2
393	S	T2	EMB	2	0	2	0	FT	2	0	2	0	FT	2	0	2	0	FT
330	D	T3	EMB	0	0	1	1	T2	1	1	1	1	T3	0	0	0	0	T4
338	S	T1	control 2	0	0	0	0	T1	0	0	0	0	T1	0	0	0	0	T1
134	D	T4	control 2	0	0	2	1	T4	2	1	0	0	FT	1	1	1	1	T4
399	D	T5	control 1	0	0	0	0	T5	0	0	0	0	T5	0	0	0	0	T5
383	D	T6	control 1	0	0	0	0	T6	0	0	0	0	T6	0	0	0	0	T6
405	D	T14	EMB	2	1	2	0	FT	2	1	2	0	FT	2	1	2	1	FT
412	S	Talt1/17	EMB	2	0	2	0	FT	2	0	2	0	FT	2	0	2	0	FT
91	S	T2	AMN	2	0	2	0	FT	2	0	2	0	FT	2	0	2	0	FT
200	D	Talt4/20	AMN	2	1	2	0	FT	2	1	2	0	FT	2	1	2	1	FT
413	S	T9	EMB	2	0	2	0	FT	2	0	2	0	FT	2	0	2	0	FT
416	D	T3	EMB	2	1	2	0	FT	2	1	2	0	FT	2	1	2	1	FT
389	D	T11	AMN	1	1	2	0	T16	2	1	2	0	FT	2	1	2	1	FT
371	S	T6	AMN	0	0	0	0	T6	0	0	0	0	T6	0	0	0	0	T6
35	D	T12	Control 2	0	0	0	0	T12	0	0	0	0	T12	0	0	0	0	T12
226	S	T4	Control 2	2	0	0	0	FT	2	0	0	0	FT	0	0	0	0	T4
339	S	T1	Control 1	0	0	0	0	T1	0	0	0	0	T1	0	0	0	0	T1
282	D	T9	Control 1	0	0	0	0	T9	0	0	0	0	T9	0	0	0	0	T9
429	S	T4	Control 1	1	1	2	1	T4	2	0	2	0	FT	2	0	2	1	FT
329	D	T16	Control 1	1	1	2	0	T16	2	1	2	0	FT	2	1	2	0	FT
433	S	T14	Control 2	0	0	0	0	T14	0	0	0	0	T4	0	0	0	0	T14
422	D	T8	Control 2	0	0			T8			0	0	T8	0	0	0	0	T8
424	S	T12	AMN	0	0	0	0	T9	0	0	0	0	T9	0	0	0	0	T9
426	D	T1	AMN					T1					T1	1	1			T1
417	D	T14	EMB	0	0	0	0	T14	0	0	0	0	T14	0	0	0	0	T14
432	S	T4	EMB	2	0	2	0	FT	2	0	2	0	FT	2	0	2	0	FT
420	D	T11	AMN	0	0	0	0	T11	0	0	0	0	T11	0	0	0	0	T11
372	S	T4	AMN	2	0	0	0	FT	0	0	1	1	T4	1	1	1	1	T4
423	S	T8	EMB	0	0	0	0	T8	0	0	0	0	T8	0	0	0	0	T12
434	D	T13	EMB	0	0	0	0	T13	0	0	0	0	T13	0	0	0	0	T13
144	D	T15	Control 2	1	1	1	1	T15	0	0	0	0	T15	0	0	1	1	T15
419	S	T3	Control 2	2	0	2	0	FT	2	0	2	0	FT	2	0	2	0	FT
415	S	T4	Control 1	0	0	0	0	T4	0	0	0	0	T4	0	0	0	0	T4
443	D	T8	Control 1	0	0	0	0	T8	0	0	0	0	T8	0	0	0	0	T4
445	S	T4	EMB	1	1	0	0	T4	1	1	0	0	T4	1	1	0	0	T4
447	S	T5	AMN	0	0	0	0	T16	0	0	1	1	T16	1	1	1	1	T16
449	D	T12	AMN	0	0	0	0	T12	0	0	0	0	T12	0	0	0	0	T12
454	D	T3	Control 1	0	0	0	0	T4	0	0	0	0	T4	0	0	0	0	T4
414	S	T4	Control 1	0	0	2	0	T5	2	0	2	0	FT	2	0	2	0	FT
460	S	T14	Control 2	2	0	1	1	FT	1	1	0	0	T14	1	1	1	1	T14
459	D	T6	Control 2	0	0	0	0	T6	0	0	0	0	T6	0	0	0	0	T6
438	S	T14	EMB	2	0	2	0	FT	2	0	2	0	FT	2	0	2	0	FT
446	D	T5	AMN	0	0	0	0	T5	0	0	0	0	T5	0	0	0	0	T5
461	S	T3	AMN	2	0	2	0	FT	2	0	2	0	FT	2	0	2	0	FT
462	D	T3	EMB	0	0	0	0	T3	0	0	0	0	T3	0	0	0	0	T3
303	D	T13	Control 2	0	0	0	0	T13	0	0	0	0	T13	0	0	0	0	T13
453	S	T3	Control 2	2	0	2	0	FT	2	0	2	0	FT	2	0	2	0	FT
467	D	T14	Control 1	0	0	0	0	T14	0	0	1	1	T14	1	1	1	1	T14
471	S	T14	Control 1	0	0	0	0	T14	0	0	1	1	T14	1	1	1	1	T14

## Sheet: Ontogeny
Specimen	Sex	Age (días)	Date	Morph	foto	lado	Mancha cabeza	Mancha abdomen	Fore-black right	Fore-black left	Back-black right	Back-black left	Fore-white right	Fore-white left	Back-white right	Back-white left	Fore-black rigth	Fore-black left	Back-black right	Back-black left	Fore-white right	Fore-white left	Back-white right	Back-white left
282	male	0	2017-06-27	BW	1	r	0	0	0.514		0.495		0.156		0.099		0.681		0.606		0.155		0.125
339	male	0	2017-07-02	BW	1	r	0	0	0.752		0.731		0.225		0.145		0.702		0.605		0.243		0.168
191	male	0	2017-06-21	BW	1	r	1	0	0.698		0.654		0.193		0.128		0.706		0.674		0.195		0.149
195	male	0	2017-06-21	BW	1	r	1	0	0.644		0.609		0.178		0.096		0.632		0.583		0.142		0.093
268	male	0	2017-06-25	BW	1	r	0	0	0.819		0.724		0.194		0.152		0.823		0.725		0.214		0.163
202	male	0	2017-06-21	BW	1	r	0	0	0.757		0.715		0.221		0.193		0.709		0.665		0.231		0.133
298	male	0	2017-06-28	BW	1	r	0	0	0.707		0.613		0.217		0.176		0.687		0.591		0.192		0.136
260	male	0	2017-06-25	BW	1	r	0	0	0.781		0.767		0.251		0.168		0.714		0.682		0.206		0.123
4	male	0	2017-06-11	BW	1	r	0	0	0.84		0.748		0.31		0.19		0.702		0.621		0.251		0.162
324	male	0	2017-06-29	BW	1	r	1	0	0.617		0.573		0.265		0.162		0.584		0.532		0.223		0.126
282	male	20	2017-07-17	BW	1	l	0	0		0.542		0.499		0.155		0.091		0.692		0.602		0.178		0.109
339	male	15	2017-07-17	BW	1	l	0	0		0.791		0.725		0.219		0.176		0.686		0.621		0.217		0.153
191	male	26	2017-07-17	BW	1	l	1	0		0.695		0.642		0.184		0.121		0.725		0.646		0.203		0.124
195	male	26	2017-07-17	BW	1	l	1	0		0.721		0.712		0.194		0.123		0.578		0.523		0.143		0.096
268	male	22	2017-07-17	BW	1	l	0	0		0.884		0.837		0.205		0.181		0.812		0.697		0.213		0.136
202	male	26	2017-07-17	BW	1	l	0	0		0.789		0.729		0.235		0.167		0.666		0.613		0.212		0.121
298	male	20	2017-07-18	BW	1	l	0	0		0.719		0.624		0.236		0.189		0.699		0.587		0.216		0.153
260	male	22	2017-07-17	BW	1	l	0	0		0.934		0.901		0.195		0.155		0.676		0.595		0.168		0.105
4	male	37	2017-07-18	BW	1	l	0	0		0.964		0.814		0.232		0.178		0.807		0.687		0.226		0.168
324	male	20	2017-07-19	BW	1	l	1	0		0.596		0.543		0.207		0.157		0.558		0.503		0.189		0.113
